# Supplementary material for: Identification and correction of abnormal, incomplete and mispredicted proteins in public databases
Source: PubMed Central journal article supplement (PMC2542381; doi:10.1186/1471-2105-9-353), 2008-08-27
Supplement: 1471-2105-9-353-S2.pdf [file 1471-2105-9-353-S2.pdf]

**Additional file 2. List of erroneous Swiss-Prot sequences identified by MisPred.** Comments on these Swiss-Prot entries are found in Additional file 1, Part 1. Entries not annotated as fragments or chimeras in Swiss-Prot are in bold in the table.

|                                |                    |                   |                    |
|--------------------------------|--------------------|-------------------|--------------------|
| <i>Homo sapiens</i>            | <b>Conflict 1</b>  | <b>Conflict 4</b> | <b>Conflict 5</b>  |
|                                | ACROL_HUMAN        | HB2T_HUMAN        | <b>CR030_HUMAN</b> |
|                                | MUC5A_HUMAN        | POK9_HUMAN        | <b>MED12_HUMAN</b> |
|                                | POZP3_HUMAN        | M4A4E_HUMAN       |                    |
|                                | HB2G_HUMAN         | <b>VHLL_HUMAN</b> |                    |
|                                | <b>LPLC4_HUMAN</b> |                   |                    |
| <i>Mus musculus</i>            | <b>Conflict 1</b>  | <b>Conflict 4</b> | <b>Conflict 5</b>  |
|                                | <b>C209C_MOUSE</b> | MYO1A_MOUSE       |                    |
|                                | LYG6_MOUSE         |                   |                    |
|                                | MCPT3_MOUSE        |                   |                    |
|                                | <b>NOE2_MOUSE</b>  |                   |                    |
|                                | <b>TMPS7_MOUSE</b> |                   |                    |
| <i>Rattus norvegicus</i>       | <b>Conflict 1</b>  | <b>Conflict 4</b> | <b>Conflict 5</b>  |
|                                | ANGP2_RAT          | ADA18_RAT         | <b>TRPC3_RAT</b>   |
|                                | CADH4_RAT          | AL7A1_RAT         | <b>SYJ2B_RAT</b>   |
|                                | CATG_RAT           | AMPD2_RAT         |                    |
|                                | CO5_RAT            | CO8B_RAT          |                    |
|                                | CO8B_RAT           | DUS7_RAT          |                    |
|                                | COBA1_RAT          | <b>EPHA5_RAT</b>  |                    |
|                                | <b>CSF2_RAT</b>    | E2F1_RAT          |                    |
|                                | FA9_RAT            | FER_RAT           |                    |
|                                | GDF11_RAT          | KITH_RAT          |                    |
|                                | KLK10_RAT          | MAAI_RAT          |                    |
|                                | KLK3_RAT           | PTN23_RAT         |                    |
|                                | <b>MIP2A_RAT</b>   | RPGF4_RAT         |                    |
|                                | MUC2L_RAT          | SFRP1_RAT         |                    |
|                                | NID1_RAT           | UCK2_RAT          |                    |
|                                | PDGFB_RAT          |                   |                    |
|                                | SFRP1_RAT          |                   |                    |
| <i>Gallus gallus</i>           | <b>Conflict 1</b>  | <b>Conflict 4</b> | <b>Conflict 5</b>  |
|                                | <b>SECR_CHICK</b>  | ALDOC_CHICK       |                    |
|                                | CO2A1_CHICK        | AMPD1_CHICK       |                    |
|                                | TGFB1_CHICK        | AT2B1_CHICK       |                    |
|                                | CATL_CHICK         | FZD3_CHICK        |                    |
|                                | FINC_CHICK         | FZD6_CHICK        |                    |
|                                | <b>PYY_CHICK</b>   | HXA9_CHICK        |                    |
|                                | <b>IGF2_CHICK</b>  | LAMBV_CHICK       |                    |
|                                | <b>NMU_CHICK</b>   | S100G_CHICK       |                    |
|                                | <b>AMP1_CHICK</b>  |                   |                    |
|                                | CFBL_CHICK         |                   |                    |
|                                | <b>RNL2_CHICK</b>  |                   |                    |
|                                | <b>IPK1L_CHICK</b> |                   |                    |
|                                | LAMB1_CHICK        |                   |                    |
|                                | LAMBV_CHICK        |                   |                    |
|                                | FIBB_CHICK         |                   |                    |
|                                | SEM4D_CHICK        |                   |                    |
|                                | BMP2_CHICK         |                   |                    |
|                                | WNT1_CHICK         |                   |                    |
|                                | SORL_CHICK         |                   |                    |
| <i>Danio rerio</i>             | <b>Conflict 1</b>  | <b>Conflict 4</b> | <b>Conflict 5</b>  |
|                                | OSTC_BRARE         | DHH_BRARE         |                    |
| <i>Caenorhabditis elegans</i>  | <b>Conflict 1</b>  | <b>Conflict 4</b> | <b>Conflict 5</b>  |
|                                | <b>YOW6_CAEEL</b>  | PME6_CAEEL        |                    |
|                                | <b>YL54_CAEEL</b>  | <b>YQS2_CAEEL</b> |                    |
|                                | <b>YL15_CAEEL</b>  |                   |                    |
|                                | <b>NAS10_CAEEL</b> |                   |                    |
|                                | <b>LAML1_CAEEL</b> |                   |                    |
|                                | <b>YP95_CAEEL</b>  |                   |                    |
|                                | <b>NAS13_CAEEL</b> |                   |                    |
|                                | <b>CUBN_CAEEL</b>  |                   |                    |
| <i>Drosophila melanogaster</i> | <b>Conflict 1</b>  | <b>Conflict 4</b> | <b>Conflict 5</b>  |

|  |                    |  |  |
|--|--------------------|--|--|
|  | <b>CHIT3_DROME</b> |  |  |
|  | <b>CHIT1_DROME</b> |  |  |
