# Supplementary material for: Identification and correction of abnormal, incomplete and mispredicted proteins in public databases
Source: PubMed Central journal article supplement (PMC2542381; doi:10.1186/1471-2105-9-353), 2008-08-27
Supplement: 1471-2105-9-353-S3.pdf [file 1471-2105-9-353-S3.pdf]

**Additional file 3. List of extracellular Pfam-A domain families.** The table contains obligatory extracellular Pfam-A domain families which were used to predict subcellular localization of proteins. Our domain co-occurrence analyses of Metazoan UniProtKB entries have identified 166 obligatory extracellular Pfam-A domain families, the majority of which are also identified as such in the SMART database.

| <b>Description</b>                                                                                  | <b>SMART name</b> | <b>Pfam name</b> | <b>Pfam ID</b> |
|-----------------------------------------------------------------------------------------------------|-------------------|------------------|----------------|
| Amyloid A4                                                                                          | A4_EXTRA          | A4_EXTRA         | PF02177        |
| Plant lipid transfer protein / seed storage protein / trypsin-alpha amylase inhibitor domain family | AAI               | Tryp_alpha_amyl  | PF00234        |
| Serum albumin                                                                                       | ALBUMIN           | Serum_albumin    | PF00273        |
| Ami_2                                                                                               | Ami_2             | Amidase_2        | PF01510        |
| Ami_3                                                                                               | Ami_3             | Amidase_3        | PF01520        |
| Adhesion-associated domain present in MUC4 and other proteins                                       | AMOP              | AMOP             | PF03782        |
| Anaphylatoxin homologous domain                                                                     | ANATO             | ANATO            | PF01821        |
| APPLE domain                                                                                        | APPLE             | PAN              | PF00024        |
| Bulb-type mannose-specific lectin                                                                   | B_lectin          | B_lectin         | PF01453        |
| Bacterial Ig-like domain (group 1)                                                                  | BID_1             | Big_1            | PF02369        |
| Bacterial Ig-like domain 2                                                                          | BID_2             | Big_2            | PF02368        |
| Bacterial OsmY and nodulation domain                                                                | BON               | BON              | PF04972        |
| Bowman-Birk type proteinase inhibitor                                                               | BowB              | Bowman-Birk_leg  | PF00228        |
| BPI/LBP/CETP N-terminal domain                                                                      | BPI1              | LBP_BPI_CETP     | PF01273        |
| Complement component C1q domain                                                                     | C1Q               | C1q              | PF00386        |
| Netrin C-terminal Domain                                                                            | C345C             | NTR              | PF01759        |
| C-terminal tandem repeated domain in type 4 procollagens                                            | C4                | C4               | PF01413        |
| Cadherin repeats                                                                                    | CA                | Cadherin         | PF00028        |
| Calcitonin                                                                                          | CALCITONIN        | Calc_CGRP_IAPP   | PF00214        |
| Cellulose Binding Domain Type IV                                                                    | CBD_IV            | CBM_6            | PF03422        |
| Domain abundant in complement control proteins; SUSHI repeat; short complement-like repeat (SCR)    | CCP               | Sushi            | PF00084        |
| CFEM                                                                                                | CFEM              | CFEM             | PF05730        |
| A domain in the BMP inhibitor chordin and in microbial proteins                                     | CHRD              | CHRD             | PF07452        |
| Chitin binding domain                                                                               | ChtBD1            | Chitin_bind_1    | PF00187        |
| Chitin-binding domain type 2                                                                        | ChtBD2            | CBM_14           | PF01607        |
| Chitin-binding domain type 3                                                                        | ChtBD3            | CBM_5_12         | PF02839        |
| Clostridial hydrophobic, with a conserved W residue, domain                                         | ChW               | ChW              | PF01584        |
| CLUSTERIN alpha chain                                                                               | CLa               | Clusterin        | PF01093        |
| CLUSTERIN Beta chain                                                                                | CLb               | Clusterin        | PF01093        |
| C-type lectin (CTL) or carbohydrate-recognition domain (CRD)                                        | CLECT             | Lectin_C         | PF00059        |
| Connexin homologues                                                                                 | CNX               | Connexin         | PF00029        |
| Fibrillar collagens C-terminal domain                                                               | COLFI             | COLFI            | PF01410        |
| Corticotropin-releasing factor                                                                      | CRF               | CRF              | PF00473        |

\*Highlighted **extracellular** domain families found to be multilocale.

| Description                                                                                 | SMART name | Pfam name      | Pfam ID |
|---------------------------------------------------------------------------------------------|------------|----------------|---------|
| Granulocyte-macrophage colony-simulating factor (GM-CSF)                                    | CSF2       | GM_CSF         | PF01109 |
| Domain first found in C1r, C1s, uEGF, and bone morphogenetic protein                        | CUB        | CUB            | PF00431 |
| Defensin/corticostatin family                                                               | DEFSN      | Defensin_beta  | PF00711 |
| Homologues of snake disintegrins                                                            | DISIN      | Disintegrin    | PF00200 |
| DM4/DM12 family of domains in <i>Drosophila melanogaster</i> proteins of unknown function   | DM4_12     | DM4_12         | PF07841 |
| Cysteine-rich domain currently specific to <i>Drosophila</i>                                | DM6        | DUF1431        | PF07248 |
| Possible catecholamine-binding domain present in a variety of eukaryotic proteins           | DoH        | DOMON          | PF03351 |
| Delta serrate ligand                                                                        | DSL        | DSL            | PF01414 |
| Epidermal growth factor-like domain                                                         | EGF        | EGF            | PF00008 |
| Calcium-binding EGF-like domain                                                             | EGF_CA     | EGF_CA         | PF07645 |
| Laminin-type epidermal growth factor-like domain                                            | EGF_Lam    | Laminin_EGF    | PF00053 |
| Endothelin                                                                                  | END        | Endothelin     | PF00322 |
| Ependymins                                                                                  | EPEND      | Ependymin      | PF00811 |
| Ephrin receptor ligand binding domain                                                       | EPH_lbd    | Ephrin_lbd     | PF01404 |
| Four repeated domains in the Fasciclin I family of proteins, present in many other contexts | FAS1       | Fasciclin      | PF02469 |
| Fibrinogen-related domains (FRDs)                                                           | FBG        | Fibrinogen_C   | PF00147 |
| Fungal-type cellulose-binding domain                                                        | fCBD       | CBM_1          | PF00734 |
| Fibronectin type 1 domain                                                                   | FN1        | fn1            | PF00039 |
| Fibronectin type 2 domain                                                                   | FN2        | fn2            | PF00040 |
| Frizzled                                                                                    | FRI        | Fz             | PF01392 |
| Furin-like repeats                                                                          | FU         | Furin-like     | PF00757 |
| G2 nidogen domain and fibulin                                                               | G2F        | G2F            | PF07474 |
| Gastrin / cholecystokinin / caerulein family                                                | GASTRIN    | Gastrin        | PF00918 |
| Glycoprotein hormone alpha chain homologues                                                 | GHA        | Hormone_6      | PF00236 |
| Glycoprotein hormone beta chain homologues                                                  | GHB        | Cys_knot       | PF00007 |
| Domain containing Gla (gamma-carboxyglutamate) residues                                     | GLA        | Gla            | PF00594 |
| Glucagon like hormones                                                                      | GLUCA      | Hormone_2      | PF00123 |
| Glycosyl hydrolase family 10                                                                | Glyco_10   | Glyco_hydro_10 | PF00331 |
| Glyco_18                                                                                    | Glyco_18   | Glyco_hydro_18 | PF00704 |
| Glycosyl hydrolases family 25                                                               | Glyco_25   | Glyco_hydro_25 | PF01183 |
| Glycosyl hydrolases family 32                                                               | Glyco_32   | Glyco_hydro_32 | PF00251 |
| G-protein-coupled receptor proteolytic site domain                                          | GPS        | GPS            | PF01825 |
| Granulin                                                                                    | GRAN       | Granulin       | PF00396 |
| Hint (Hedgehog/Intein) domain C-terminal region                                             | HintC      | Hint           | PF01079 |
| Hint (Hedgehog/Intein) domain N-terminal region                                             | HintN      | Hint           | PF01079 |

\*Highlighted **extracellular** domain families found to be multilocal.

| Description                                                                 | SMART name | Pfam name       | Pfam ID |
|-----------------------------------------------------------------------------|------------|-----------------|---------|
| Domain present in hormone receptors                                         | HormR      | HRM             | PF02793 |
| Hemopexin-like repeats                                                      | HX         | Hemopexin       | PF00045 |
| Hydrophobins                                                                | HYDRO      | Hydrophobin     | PF01185 |
| Insulin growth factor-binding protein homologues                            | IB         | IGFBP           | PF00219 |
| Interferon alpha, beta and delta                                            | IFabd      | Interferon      | PF00143 |
| Interleukin-10 family                                                       | IL10       | IL10            | PF00726 |
| Interleukin-2 family                                                        | IL2        | IL2             | PF00715 |
| Interleukins 4 and 13                                                       | IL4_13     | IL4             | PF00727 |
| Interleukin-6 homologues                                                    | IL6        | IL6             | PF00489 |
| Interleukin-7 and interleukin-9 family                                      | IL7        | IL7             | PF01415 |
| Insulin / insulin-like growth factor / relaxin family                       | IIGF       | Insulin         | PF00049 |
| Integrin beta subunits (N-terminal portion of extracellular region)         | INB        | Integrin_beta   | PF00362 |
| Integrin alpha (beta-propellor repeats)                                     | Int_alpha  | Integrin_alpha  | PF00357 |
| Kazal type serine protease inhibitors                                       | KAZAL      | Kazal_1         | PF00050 |
| Kazal type serine protease inhibitors                                       | KAZAL      | Kazal_2         | PF07648 |
| Knottins                                                                    | Knot1      | Defensin_2      | PF01097 |
| Kringle domain                                                              | KR         | Kringle         | PF00051 |
| BPTI/Kunitz family of serine protease inhibitors                            | KU         | Kunitz_BPTI     | PF00014 |
| Laminin B domain                                                            | LamB       | Laminin_B       | PF00052 |
| Laminin G domain                                                            | LamG       | Laminin_G_1     | PF00054 |
| Laminin N-terminal domain (domain VI)                                       | LamNT      | Laminin_N       | PF00055 |
| LCCL                                                                        | LCCL       | LCCL            | PF03815 |
| Low-density lipoprotein receptor domain class A                             | LDLa       | Ldl_recept_a    | PF00057 |
| Leukemia inhibitory factor                                                  | LIF_OSM    | LIF_OSM         | PF01291 |
| Link (Hyaluronan-binding)                                                   | LINK       | Xlink           | PF00193 |
| Lipoprotein N-terminal Domain                                               | LPD_N      | Vitellogenin_N  | PF01347 |
| Ly-6 antigen / uPA receptor -like domain                                    | LU         | UPAR_LY6        | PF00021 |
| Low-density lipoprotein-receptor YWTD domain                                | LY         | Ldl_recept_b    | PF00058 |
| Alpha-lactalbumin / lysozyme C                                              | LYZ1       | Lys             | PF00062 |
| Lysozyme subfamily 2                                                        | LYZ2       | Glucosaminidase | PF01832 |
| Membrane-attack complex / perforin                                          | MACPF      | MACPF           | PF01823 |
| Domain in meprin, A5, receptor protein tyrosine phosphatase mu (and others) | MAM        | MAM             | PF00629 |
| Domain involved in innate immunity and lipid metabolism                     | ML         | E1_DerP2_DerF2  | PF02221 |
| NEAr Transporter domain                                                     | NEAT       | NEAT            | PF05031 |
| Nerve growth factor (NGF or beta-NGF)                                       | NGF        | NGF             | PF00243 |
| Neurohypophysial hormones                                                   | NH         | Hormone_5       | PF00184 |

\*Highlighted **extracellular** domain families found to be multilocal.

| Description                                                                              | SMART name | Pfam name       | Pfam ID |
|------------------------------------------------------------------------------------------|------------|-----------------|---------|
| Extracellular domain of unknown function in nidogen (entactin) and hypothetical proteins | NIDO       | NIDO            | PF06119 |
| Domain found in Notch and Lin-12                                                         | NL         | Notch           | PF00066 |
| Neuromedin U                                                                             | NMU        | NMU             | PF02070 |
| Tissue inhibitor of metalloproteinase family                                             | NTR        | TIMP            | PF00965 |
| DNA/RNA non-specific endonuclease*                                                       | NUC        | Endonuclease_NS | PF01223 |
| Olfactomedin-like domains                                                                | OLF        | OLF             | PF02191 |
| Osteopontin                                                                              | OSTEO      | Osteopontin     | PF00865 |
| Phospholipase A2                                                                         | PA2c       | Phospholip_A2_1 | PF00068 |
| Pancreatic hormones / neuropeptide F / peptide YY family                                 | PAH        | Hormone_3       | PF00159 |
| Divergent subfamily of APPLE domains                                                     | PAN_AP     | PAN             | PF00024 |
| Bacterial periplasmic substrate-binding proteins                                         | PBPb       | SBP_bac_3       | PF00497 |
| P or trefoil or TFF domain                                                               | PD         | Trefoil         | PF00088 |
| Platelet-derived and vascular endothelial growth factors (PDGF, VEGF) family             | PDGF       | PDGF            | PF00341 |
| Papain family cysteine protease                                                          | Pept_C1    | Peptidase_C1    | PF00112 |
| Insect pheromone/odorant binding protein domains                                         | PhBP       | PBP_GOBP        | PF01395 |
| Repeats in polycystic kidney disease 1 (PKD1) and other proteins                         | PKD        | PKD             | PF00801 |
| Major prion protein                                                                      | PRP        | Prion           | PF00377 |
| Paramecium Surface Antigen Repeat                                                        | PSA        | Paramecium_SA   | PF01508 |
| Domain found in Plexins, Semaphorins and Integrins                                       | PSI        | PSI             | PF01437 |
| Plant trypsin inhibitors                                                                 | PTI        | Squash          | PF00299 |
| Pentraxin / C-reactive protein / pentaxin family                                         | PTX        | Pentaxin        | PF00354 |
| Pancreatic ribonuclease                                                                  | RNase_Pc   | RnaseA          | PF00074 |
| Serum amyloid A proteins                                                                 | SAA        | SAA             | PF00277 |
| Saposin/surfactant protein-B A-type DOMAIN                                               | SAPA       | SapA            | PF02199 |
| Saposin (B) Domains                                                                      | SapB       | SapB_1          | PF05184 |
| Saposin (B) Domains                                                                      | SapB       | SapB_2          | PF03489 |
| SCP / Tpx-1 / Ag5 / PR-1 / Sc7 family of extracellular domains                           | SCP        | SCP             | PF00188 |
| Interocrine alpha family (small cytokine C-X-C) (chemokine CXC)                          | SCY        | IL8             | PF00048 |
| Domain found in sea urchin sperm protein, enterokinase, agrin                            | SEA        | SEA             | PF01390 |
| Semaphorin domain                                                                        | Sema       | Sema            | PF01403 |
| ShK toxin domain                                                                         | ShKT       | ShTK            | PF01549 |
| Somatomedin B -like domains                                                              | SO         | Somatomedin_B   | PF01033 |
| Scavenger receptor Cys-rich                                                              | SR         | SRCR            | PF00530 |

\*Highlighted **extracellular** domain families found to be multilocal.

| Description                                                                 | SMART name | Pfam name       | Pfam ID |
|-----------------------------------------------------------------------------|------------|-----------------|---------|
| Soybean trypsin inhibitor (Kunitz) family of protease inhibitors            | STI        | Kunitz_legume   | PF00197 |
| Transforming growth factor-beta (TGF-beta) family                           | TGFB       | TGF_beta        | PF00019 |
| Thaumatococcus family                                                       | THN        | Thaumatococcus  | PF00314 |
| Tachykinin family                                                           | TK         | Tachykinin      | PF02202 |
| Tumour necrosis factor family                                               | TNF        | TNF             | PF00229 |
| Tumor necrosis factor receptor / nerve growth factor receptor repeats       | TNFR       | TNFR_c6         | PF00020 |
| Transferrin                                                                 | TR_FER     | Transferrin     | PF00405 |
| Transthyretin                                                               | TR_THY     | Transthyretin   | PF00576 |
| Trypsin-like serine protease                                                | Tryp_SPc   | Trypsin         | PF00089 |
| Thrombospondin type 1 repeats                                               | TSP1       | TSP_1           | PF00090 |
| Thyroglobulin type I repeats                                                | TY         | Thyroglobulin_1 | PF00086 |
| Uteroglobin                                                                 | UTG        | Uteroglobin     | PF01099 |
| von Willebrand factor (vWF) type C domain                                   | VWC        | VWC             | PF00093 |
| von Willebrand factor (vWF) type D domain                                   | VWD        | VWD             | PF00094 |
| Four-disulfide core domains                                                 | WAP        | WAP             | PF00095 |
| Wnt-inhibitory factor-1 like domain                                         | WIF        | WIF             | PF02019 |
| Found in Wnt-1                                                              | WNT1       | wnt             | PF00110 |
| Present in yeast cell wall integrity and stress response component proteins | WSC        | WSC             | PF01822 |
| Zinc-dependent metalloprotease                                              | ZnMc       | Peptidase_M10   | PF00413 |
| Zona pellucida (ZP) domain                                                  | ZP         | Zona_pellucida  | PF00100 |
| ADAM-TS Spacer 1                                                            | -          | ADAM_spacer1    | PF05986 |
| Animal haem peroxidase                                                      | -          | An_peroxidase   | PF03098 |
| Antistasin                                                                  | -          | Antistasin      | PF02822 |
| Copper type II ascorbate-dependent monooxygenase, C-terminal domain         | -          | Cu2_monoox_C    | PF03712 |
| Copper type II ascorbate-dependent monooxygenase, N-terminal domain         | -          | Cu2_monooxygen  | PF01082 |
| Laminin Domain I                                                            | -          | Laminin_I       | PF06008 |
| Laminin Domain II                                                           | -          | Laminin_II      | PF06009 |
| Laminin G domain                                                            | TSPN       | Laminin_G_2     | PF02210 |
| Class I Histocompatibility antigen, domains alpha 1 and 2                   | -          | MHC_I           | PF00129 |
| Class II histocompatibility antigen, beta domain                            | -          | MHC_II_beta     | PF00969 |
| Agrin NtA domain                                                            | -          | NtA             | PF03146 |
| Reprolysin (M12B) family zinc metalloprotease                               | -          | Reprolysin      | PF01421 |

\*Highlighted **extracellular** domain families found to be multilocal.
