# Supplementary material for: Identification and correction of abnormal, incomplete and mispredicted proteins in public databases
Source: PubMed Central journal article supplement (PMC2542381; doi:10.1186/1471-2105-9-353), 2008-08-27
Supplement: 1471-2105-9-353-S4.pdf [file 1471-2105-9-353-S4.pdf]

**Additional file 4. List of intracellular Pfam-A signaling domain families.** The table contains obligatory cytoplasmic Pfam-A domain families which were used to predict subcellular localization of proteins. Our domain co-occurrence analyses of Metazoan UniProtKB entries have identified 115 obligatory cytoplasmic Pfam-A domain families, the majority of which are also identified as such in the SMART database.

| Description                                                              | SMART name  | Pfam name      | Pfam ID |
|--------------------------------------------------------------------------|-------------|----------------|---------|
| 14-3-3 homologues                                                        | 14_3_3      | 14-3-3         | PF00244 |
| Actin depolymerisation factor/cofilin -like domains                      | ADF         | Cofilin_ADF    | PF00241 |
| Ankyrin repeats                                                          | ANK         | Ank            | PF00023 |
| ARF-like small GTPases; ARF, ADP-ribosylation factor                     | ARF         | Arf            | PF00025 |
| Putative GTP-ase activating proteins for the small GTPase, ARF           | ArfGap      | ArfGap         | PF01412 |
| Band 4.1 homologues                                                      | B41         | Band_41        | PF00373 |
| Cytochrome b-561 / ferric reductase transmembrane domain                 | B561        | Cytochrom_B561 | PF03188 |
| Bulb-type mannose-specific lectin                                        | B_lectin    | B_lectin       | PF01453 |
| BAG domains, present in regulator of Hsp70 proteins                      | BAG         | BAG            | PF02179 |
| BH4 Bcl-2 homology region 4                                              | BH4         | BH4            | PF02180 |
| Bruton's tyrosine kinase Cys-rich motif                                  | BTK         | BTK            | PF00779 |
| Protein kinase C conserved region 1 (C1) domains (Cysteine-rich domains) | DAG_PE-bind | C1_1           | PF00130 |
| Calponin homology domain                                                 | CH          | CH             | PF00307 |
| Two component signalling adaptor domain                                  | CheW        | CheW           | PF01584 |
| Domain found in NIK1-like kinases, mouse citron and yeast ROM1, ROM2     | CNH         | CNH            | PF00780 |
| Cyclic nucleotide-monophosphate binding domain                           | cNMP        | cNMP_binding   | PF00027 |
| Cullin                                                                   | CULLIN      | Cullin         | PF00888 |
| Adenylyl- / guanylyl cyclase, catalytic domain                           | CYCc        | Guanylate_cyc  | PF00211 |
| Diacylglycerol kinase accessory domain (presumed)                        | DAGKa       | DAGK_acc       | PF00609 |
| Diacylglycerol kinase catalytic domain (presumed)                        | DAGKc       | DAGK_cat       | PF00781 |
| Domain present in Dishevelled and axin                                   | DAX         | DIX            | PF00778 |
| Death effector domain                                                    | DED         | DED            | PF01335 |
| Domain found in Dishevelled, Egl-10, and Pleckstrin                      | DEP         | DEP            | PF00610 |
| Dual specificity phosphatase, catalytic domain                           | DSPc        | DSPc           | PF00782 |
| Domain of Unknown Function with GGDEF motif                              | DUF1        | GGDEF          | PF00990 |
| Domain of Unknown Function 2                                             | DUF2        | EAL            | PF00563 |
| Dynamin, GTPase                                                          | DYNc        | Dynamin_N      | PF00350 |
| Epsin N-terminal homology (ENTH) domain                                  | ENTH        | ENTH           | PF01417 |
| A Receptor for Ubiquitination Targets                                    | FBOX        | F-box          | PF00646 |
| Fes/CIP4 homology domain                                                 | FCH         | FCH            | PF00611 |
| Contains two conserved F residues                                        | FF          | FF             | PF01846 |
| Formin Homology 2 Domain                                                 | FH2         | FH2            | PF02181 |
| Forkhead associated domain                                               | FHA         | FHA            | PF00498 |
| Protein present in Fab1, YOTB, Vac1, and EEA1                            | FYVE        | FYVE           | PF01363 |
| Growth-Arrest-Specific Protein 2 Domain                                  | GAS2        | GAS2           | PF02187 |
| Dynamin GTPase effector domain                                           | GED         | GED            | PF02212 |

| <b>Description</b>                                                                            | <b>SMART name</b> | <b>Pfam name</b> | <b>Pfam ID</b> |
|-----------------------------------------------------------------------------------------------|-------------------|------------------|----------------|
| G protein gamma subunit-like motifs                                                           | GGL               | G-gamma          | PF00631        |
| LGN motif, putative GEFs specific for G-alpha GTPases                                         | GoLoco            | GoLoco           | PF02188        |
| Domain in glucosyltransferases, myotubularins and other putative membrane-associated proteins | GRAM              | GRAM             | PF02893        |
| Guanylate kinase homologues                                                                   | GuKc              | Guanylate_kin    | PF00625        |
| HAMP (Histidine kinases, Adenylyl cyclases, Methyl binding proteins, Phosphatases) domain     | HAMP              | HAMP             | PF00672        |
| Histidine kinase-like ATPases                                                                 | HATPase_c         | HATPase_c        | PF02518        |
| Domain Homologous to E6-AP Carboxyl Terminus with                                             | HECTc             | HECT             | PF00632        |
| His Kinase A (phosphoacceptor) domain                                                         | HisKA             | HisKA            | PF00512        |
| Histidine Phosphotransfer domain                                                              | HPT               | Hpt              | PF01627        |
| Rho effector or protein kinase C-related kinase homology region 1 homologues                  | Hr1               | HR1              | PF02185        |
| I/LWEQ domain                                                                                 | ILWEQ             | I_LWEQ           | PF01608        |
| Inositol polyphosphate phosphatase, catalytic domain homologues                               | IPPc              | Exo_endo_phos    | PF03372        |
| Short calmodulin-binding motif containing conserved Ile and Gln residues                      | IQ                | IQ               | PF00612        |
| Immunoreceptor tyrosine-based activation motif                                                | ITAM              | ITAM             | PF02189        |
| Kinesin motor, catalytic domain. ATPase                                                       | KISc              | Kinesin          | PF00225        |
| Domain in receptor targeting proteins Lin-2 and Lin-7                                         | L27               | L27              | PF02828        |
| Zinc-binding domain present in Lin-11, Isl-1, Mec-3                                           | LIM               | LIM              | PF00412        |
| Low molecular weight phosphatase family                                                       | LMWPc             | LMWPc            | PF01451        |
| Methyl-accepting chemotaxis-like domains (chemotaxis sensory transducer)                      | MA                | MCPsignal        | PF00015        |
| Myosin                                                                                        | MYSc              | Myosin_head      | PF00063        |
| Domain in Myosin and Kinesin Tails                                                            | MyTH4             | MyTH4            | PF00784        |
| Motif C-terminal to PAS motifs (likely to contribute to PAS structural domain)                | PAC               | PAC              | PF00785        |
| PAS domain                                                                                    | PAS               | PAS              | PF00989        |
| PASTA                                                                                         | PASTA             | PASTA            | PF03793        |
| P21-Rho-binding domain                                                                        | PBD               | PBD              | PF00786        |
| Pleckstrin homology domain                                                                    | PH                | PH               | PF00169        |
| Phosphoinositide 3-kinase, region postulated to contain C2 domain                             | PI3K_C2           | PI3K_C2          | PF00792        |
| PI3-kinase family, p85-binding domain                                                         | PI3K_p85B         | PI3K_p85B        | PF02192        |
| PI3-kinase family, Ras-binding domain                                                         | PI3K_rbd          | PI3K_rbd         | PF00794        |
| Phosphoinositide 3-kinase family, accessory domain (PIK domain)                               | PI3Ka             | PI3Ka            | PF00613        |
| Phosphoinositide 3-kinase, catalytic domain                                                   | PI3Kc             | PI3_PI4_kinase   | PF00454        |
| Phosphatidylinositol phosphate kinases                                                        | PIPKc             | PIP5K            | PF01504        |
| Cytoplasmic phospholipase A2, catalytic subunit                                               | PLAc              | PLA2_B           | PF01735        |

| <b>Description</b>                                                        | <b>SMART name</b> | <b>Pfam name</b> | <b>Pfam ID</b> |
|---------------------------------------------------------------------------|-------------------|------------------|----------------|
| Phospholipase C, catalytic domain (part); domain X                        | PLCXc             | PI-PLC-X         | PF00388        |
| Phospholipase C, catalytic domain (part); domain Y                        | PLCYc             | PI-PLC-Y         | PF00387        |
| Phospholipase D. Active site motifs                                       | PLDc              | PLDc             | PF00614        |
| Serine/threonine phosphatases, family 2C, catalytic domain                | PP2Cc             | PP2C             | PF00481        |
| Phosphotyrosine-binding domain, phosphotyrosine-interaction (PI) domain   | PTB               | PID              | PF00640        |
| Phosphotyrosine-binding domain (IRS1-like)                                | PTBI              | IRS              | PF02174        |
| Protein tyrosine phosphatase, catalytic domain                            | PTPc              | Y_phosphatase    | PF00102        |
| Protein tyrosine phosphatase, catalytic domain, undefined specificity     | PTPc_DSPc         | Y_phosphatase    | PF00102        |
| Protein tyrosine phosphatase, catalytic domain motif                      | PTPc_motif        | Y_phosphatase    | PF00102        |
| PhoX homologous domain, present in p47phox and p40phox                    | PX                | PX               | PF00787        |
| Domain associated with PX domains                                         | PXA               | PXA              | PF02194        |
| Ras association (RalGDS/AF-6) domain                                      | RA                | RA               | PF00788        |
| Ran-binding domain                                                        | RanBD             | Ran_BP1          | PF00638        |
| Ras subfamily of RAS small GTPases                                        | RAS               | Ras              | PF00071        |
| GTPase-activator protein for Ras-like GTPases                             | RasGAP            | RasGAP           | PF00616        |
| Guanine nucleotide exchange factor for Ras-like small GTPases             | RasGEF            | RasGEF           | PF00617        |
| Guanine nucleotide exchange factor for Ras-like GTPases; N-terminal motif | RasGEFN           | RasGEF_N         | PF00618        |
| Raf-like Ras-binding domain                                               | RBD               | RBD              | PF02196        |
| Regulator of G protein signalling domain                                  | RGS               | RGS              | PF00615        |
| GTPase-activator protein for Rho-like GTPases                             | RhoGAP            | RhoGAP           | PF00620        |
| Guanine nucleotide exchange factor for Rho/Rac/Cdc42-like GTPases         | RhoGEF            | RhoGEF           | PF00621        |
| RIIalpha, Regulatory subunit portion of type II PKA R-subunit             | RIIa              | RIIa             | PF02197        |
| RIO-like kinase                                                           | RIO               | RIO1             | PF01163        |
| Extension to Ser/Thr-type protein kinases                                 | S_TK_X            | Pkinase_C        | PF00433        |
| Serine/Threonine protein kinases, catalytic domain                        | S_TKc             | Pkinase          | PF00069        |
| Sterile alpha motif                                                       | SAM               | SAM_1            | PF00536        |
| Sterile alpha motif                                                       | SAM               | SAM_2            | PF07647        |
| Sec7 domain                                                               | Sec7              | Sec7             | PF01369        |
| Src homology 2 domains                                                    | SH2               | SH2              | PF00017        |
| Suppressors of cytokine signalling                                        | SOCS              | SOCS_box         | PF07525        |
| Spectrin repeats                                                          | SPEC              | Spectrin         | PF00435        |
| In StAR and phosphatidylcholine transfer protein                          | START             | START            | PF01852        |
| Protein kinase; unclassified specificity                                  | STYKc             | Pkinase          | PF00069        |
| Helical region found in SNAREs                                            | t_SNARE           | SNARE            | PF05739        |

| <b>Description</b>                                               | <b>SMART name</b> | <b>Pfam name</b> | <b>Pfam ID</b> |
|------------------------------------------------------------------|-------------------|------------------|----------------|
| Homologues of the ligand binding domain of Tar                   | TarH              | TarH             | PF02203        |
| Domain in Tre-2, BUB2p, and Cdc16p. Probable Rab-GAPs            | TBC               | TBC              | PF00566        |
| Metallochaperone-like domain                                     | TRASH             | YHS              | PF04945        |
| Tyrosine kinase, catalytic domain                                | TyrKc             | Pkinase          | PF00069        |
| Ubiquitin associated domain                                      | UBA               | UBA              | PF00627        |
| Ubiquitin homologues                                             | UBQ               | ubiquitin        | PF00240        |
| Domain present in ubiquitin-regulatory proteins                  | UBX               | UBX              | PF00789        |
| Domain present in VPS-27, Hrs and STAM                           | VHS               | VHS              | PF00790        |
| Domain present in VPS9                                           | VPS9              | VPS9             | PF02204        |
| WD40 repeats                                                     | WD40              | WD40             | PF00400        |
| WASP homology region 1                                           | WH1               | WH1              | PF00568        |
| Wiskott Aldrich syndrome homology region 2                       | WH2               | WH2              | PF02205        |
| Domain with 2 conserved Trp (W) residues                         | WW                | WW               | PF00397        |
| A20-like zinc fingers                                            | ZnF_A20           | zf-A20           | PF01754        |
| Zinc-binding domain, present in Dystrophin, CREB-binding protein | ZnF_ZZ            | ZZ               | PF00569        |
| Domain present in ZO-1 and Unc5-like netrin receptors            | ZU5               | ZU5              | PF00791        |
