# Supplementary material for: Identification and correction of abnormal, incomplete and mispredicted proteins in public databases
Source: PubMed Central journal article supplement (PMC2542381; doi:10.1186/1471-2105-9-353), 2008-08-27
Supplement: 1471-2105-9-353-S5.pdf [file 1471-2105-9-353-S5.pdf]

**Additional file 5. List of nuclear Pfam-A domain families.** The table contains obligatory nuclear Pfam-A domain families which were used to predict subcellular localization of proteins. Our domain co-occurrence analyses of Metazoan UniProtKB entries have identified 126 obligatory nuclear Pfam-A domain families, the majority of which are also identified as such in the SMART database.

| Description                                                                      | SMART name | Pfam name    | Pfam ID |
|----------------------------------------------------------------------------------|------------|--------------|---------|
| 3'-5' exonuclease                                                                | 35EXOc     | 3_5_exonuc   | PF01612 |
| 5'-3' exonuclease                                                                | 53EXOc     | 5_3_exonuc   | PF01367 |
| tRNA-specific and double-stranded RNA adenosine deaminase (RNA-specific editase) | ADEAMc     | A_deamin     | PF02137 |
| DNA-binding domain in plant proteins such as APETALA2 and EREBPs                 | AP2        | AP2          | PF00847 |
| AP endonuclease family 2                                                         | AP2Ec      | AP_endonuc_2 | PF01261 |
| Bromo adjacent homology domain                                                   | BAH        | BAH          | PF01426 |
| Basic domain in HLH proteins of MYOD family                                      | BASIC      | Basic        | PF01586 |
| B-Box-type zinc finger                                                           | BBOX       | zf-B_box     | PF00643 |
| BCL (B-Cell lymphoma); contains BH1, BH2 regions                                 | BCL        | Bcl-2        | PF00452 |
| Breast cancer carboxy-terminal domain                                            | BRCT       | BRCT         | PF00533 |
| BRIGHT, ARID (A/T-rich interaction domain) domain                                | BRIGHT     | ARID         | PF01388 |
| Domain in transcription and CHROMO domain helicases                              | BRK        | TCH          | PF07533 |
| Basic region leucin zipper                                                       | BRLZ       | bZIP         | PF00170 |
| Bromo domain                                                                     | BROMO      | Bromodomain  | PF00439 |
| Domain in transcription factors and synapse-associated proteins                  | BSD        | BSD          | PF03909 |
| Bromodomain transcription factors and PHD domain containing proteins             | BTP        | Bromo_TP     | PF07524 |
| CCAAT-Binding transcription Factor                                               | CBF        | CBFB_NFYA    | PF02045 |
| Chromatin organization modifier domain                                           | CHROMO     | Chromo       | PF00385 |
| Catalytic domain of ctd-like phosphatases                                        | CPDc       | NIF          | PF03031 |
| Cold shock protein domain                                                        | CSP        | CSD          | PF00313 |
| Copper-Fist                                                                      | Cu_Fist    | Copper-fist  | PF00649 |
| Domain in different transcription and chromosome remodeling factors              | DDT        | DDT          | PF02791 |
| DEAD-like helicases superfamily                                                  | DEXDc      | SNF2_N       | PF00176 |
| Doublesex DNA-binding motif                                                      | DM         | DM           | PF00751 |
| Double-stranded RNA binding motif                                                | DSRM       | dsrm         | PF00035 |
| Domain A in dwarfin family proteins                                              | DWA        | MH1          | PF03165 |
| Domain B in dwarfin family proteins                                              | DWB        | MH2          | PF03166 |
| Domain in DSRM or ZnF_C2H2 domain containing proteins                            | DZF        | DZF          | PF07528 |
| Domain at the C-termini of GCD6, eIF-2B epsilon, eIF-4 gamma and eIF-5           | eIF5C      | W2           | PF02020 |
| Elongator protein 3, MiaB family, Radical SAM                                    | Elp3       | Radical_SAM  | PF04055 |
| Endonuclease III                                                                 | ENDO3c     | HhH-GPD      | PF00730 |
| Erythroblast transformation specific domain                                      | ETS        | Ets          | PF00178 |

| <b>Description</b>                                                  | <b>SMART name</b> | <b>Pfam name</b> | <b>Pfam ID</b> |
|---------------------------------------------------------------------|-------------------|------------------|----------------|
| EXOIII                                                              | EXOIII            | Exonuc_X-T       | PF00929        |
| FORKHEAD                                                            | FH                | Fork_head        | PF00250        |
| "FY-rich" domain, C-terminal region                                 | FYRC              | FYRC             | PF05965        |
| "FY-rich" domain, N-terminal region                                 | FYRN              | FYRN             | PF05964        |
| Glycine rich nucleic binding domain                                 | G_patch           | G-patch          | PF01585        |
| GIY-YIG type nucleases (URI domain)                                 | GIYc              | GIY-YIG          | PF01541        |
| Domain in histone families 1 and 5                                  | H15               | Linker_histone   | PF00538        |
| Histone 2A                                                          | H2A               | Histone          | PF00125        |
| Histone H2B                                                         | H2B               | Histone          | PF00125        |
| Histone H3                                                          | H3                | Histone          | PF00125        |
| Histone H4                                                          | H4                | Histone          | PF00125        |
| Homeobox associated leucin zipper                                   | HALZ              | HALZ             | PF02183        |
| Helicase superfamily c-terminal domain                              | HELICc            | Helicase_C       | PF00271        |
| Helix-hairpin-helix DNA-binding motif class 1                       | HhH1              | HHH              | PF00633        |
| High mobility group                                                 | HMG               | HMG_box          | PF00505        |
| Domain in high mobility group proteins HMG14 and HMG 17             | HMG17             | HMG14_17         | PF01101        |
| HNH nucleases                                                       | HNHc              | HNH              | PF01844        |
| Domain in histone-like proteins of HNS family                       | HNS               | Histone_HNS      | PF00816        |
| Ligand binding domain of hormone receptors                          | HOLI              | Hormone_recep    | PF00104        |
| Helicase and RNase D C-terminal                                     | HRDC              | HRDC             | PF00570        |
| Domain in helicases and associated with SANT domains                | HSA               | HSA              | PF07529        |
| Helix_turn_helix, arabinose operon control protein                  | HTH_ARAC          | HTH_AraC         | PF00165        |
| Helix_turn_helix, Arsenical Resistance Operon Repressor             | HTH_ARSR          | HTH_5            | PF01022        |
| Helix_turn_helix ASNC type                                          | HTH_ASNC          | AsnC_trans_reg   | PF01037        |
| Helix_turn_helix, Deoxyribose operon repressor                      | HTH_DEOR          | DeoR             | PF00455        |
| Helix-turn-helix diphtheria tox regulatory element                  | HTH_DTXR          | Fe_dep_repress   | PF01325        |
| Helix_turn_helix gluconate operon transcriptional repressor         | HTH_GNTR          | GntR             | PF00392        |
| Helix_turn_helix lactose operon repressor                           | HTH_LACI          | LacI             | PF00356        |
| Helix_turn_helix multiple antibiotic resistance protein             | HTH_MARR          | MarR             | PF01047        |
| Helix_turn_helix, mercury resistance                                | HTH_MERR          | MerR             | PF00376        |
| Helix-turn-helix XRE-family like proteins                           | HTH_XRE           | HTH_3            | PF01381        |
| Intron encoded nuclease repeat motif                                | IENR1             | NUMOD1           | PF07453        |
| Intron-encoded nuclease repeat 2                                    | IENR2             | NUMOD3           | PF07460        |
| Interferon regulatory factor                                        | IRF               | IRF              | PF00605        |
| A domain family that is part of the cupin metalloenzyme superfamily | JmjC              | JmjC             | PF02373        |

| <b>Description</b>                                                                                                                               | <b>SMART name</b> | <b>Pfam name</b> | <b>Pfam ID</b> |
|--------------------------------------------------------------------------------------------------------------------------------------------------|-------------------|------------------|----------------|
| Small domain found in the jumonji family of transcription factors                                                                                | JmjN              | JmjN             | PF02375        |
| KOW (Kyprides, Ouzounis, Woese) motif                                                                                                            | KOW               | KOW              | PF00467        |
| In nuclear membrane-associated proteins                                                                                                          | LEM               | LEM              | PF03020        |
| Ligase N family                                                                                                                                  | LIGANc            | DNA_ligase_aden  | PF01653        |
| Domain in DAP-5, eIF4G, MA-3 and other proteins                                                                                                  | MA3               | MA3              | PF02847        |
| MADS                                                                                                                                             | MADS              | SRF-TF           | PF00319        |
| Methyl-CpG binding domain                                                                                                                        | MBD               | MBD              | PF01429        |
| Minichromosome maintenance proteins                                                                                                              | MCM               | MCM              | PF00493        |
| ATPase domain of DNA mismatch repair MUTS family                                                                                                 | MUTSac            | MutS_V           | PF00488        |
| NEUZ                                                                                                                                             | NEUZ              | Neuralized       | PF07177        |
| Orange domain                                                                                                                                    | ORANGE            | Hairy_orange     | PF07527        |
| ParB-like nuclease domain                                                                                                                        | ParB              | ParBc            | PF02195        |
| Paired Box domain                                                                                                                                | PAX               | PAX              | PF00292        |
| PHD zinc finger                                                                                                                                  | PHD               | PHD              | PF00628        |
| Short conserved domain in transcriptional regulators                                                                                             | Plus3             | Plus-3           | PF03126        |
| DNA polymerase III beta subunit                                                                                                                  | POL3Bc            | DNA_pol3_beta    | PF00712        |
| DNA polymerase A domain                                                                                                                          | POLAc             | DNA_pol_A        | PF00476        |
| DNA polymerase type-B family                                                                                                                     | POLBc             | DNA_pol_B        | PF00136        |
| DNA polymerase alpha chain like domain                                                                                                           | POLIIIAc          | PHP              | PF02811        |
| A domain found in a protein subunit of human RNase MRP and RNase P ribonucleoprotein complexes and archaeal proteins                             | POP4              | UPF0086          | PF01868        |
| Found in Pit-Oct-Unc transcription factors                                                                                                       | POU               | Pou              | PF00157        |
| Domain associated with HOX domains                                                                                                               | POX               | POX              | PF07526        |
| PRE_C2HC                                                                                                                                         | PRE_C2HC          | PRE_C2HC         | PF07530        |
| N-terminal to some SET domains                                                                                                                   | PreSET            | Pre-SET          | PF05033        |
| Proline-rich domain in spliceosome associated proteins                                                                                           | PSP               | PSP              | PF04046        |
| DNA/RNA-binding repeats in PUR-alpha/beta/gamma and in hypothetical proteins from spirochetes and the Bacteroides-Cytophaga-Flexibacter bacteria | PUR               | PurA             | PF04845        |
| Ribonuclease III family                                                                                                                          | RIBOc             | Ribonuclease_3   | PF00636        |
| DNA-directed RNA-polymerase II subunit                                                                                                           | RPOL4c            | RNA_pol_Rpb4     | PF03874        |
| RNA polymerase subunit 8                                                                                                                         | RPOL8c            | RNA_pol_Rpb8     | PF03870        |
| RNA polymerase subunit 9                                                                                                                         | RPOL9             | RNA_POL_M_15KD   | PF02150        |
| RNA polymerase I subunit A N-terminus                                                                                                            | RPOLA_N           | RNA_pol_Rpb1_2   | PF00623        |
| RNA polymerase subunit CX                                                                                                                        | RPOLCX            | DNA_RNApol_7kD   | PF03604        |
| RNA polymerases D                                                                                                                                | RPOLD             | RNA_pol_A_bac    | PF01000        |

| Description                                                                                 | SMART name | Pfam name    | Pfam ID |
|---------------------------------------------------------------------------------------------|------------|--------------|---------|
| RPR                                                                                         | RPR        | DUF618       | PF04818 |
| S4 RNA-binding domain                                                                       | S4         | S4           | PF01479 |
| Putative DNA-binding (bihelical) motif predicted to be involved in chromosomal organisation | SAP        | SAP          | PF02037 |
| SET (Su(var)3-9, Enhancer-of-zeste, Trithorax) domain                                       | SET        | SET          | PF00856 |
| Found in Skp1 protein family                                                                | Skp1       | Skp1         | PF01466 |
| snRNP Sm proteins                                                                           | Sm         | LSM          | PF01423 |
| SPK                                                                                         | SPK        | SPK          | PF04435 |
| SET and RING finger associated domain                                                       | SRA        | YDG_SRA      | PF02182 |
| STE like transcription factors                                                              | STE        | STE          | PF02200 |
| Domain first found in the mice T locus (Brachyury) protein                                  | TBOX       | T-box        | PF00907 |
| TEA domain                                                                                  | TEA        | TEA          | PF01285 |
| Transcription initiation factor IIE                                                         | TFIIE      | TFIIE_alpha  | PF02002 |
| Domain in the central regions of transcription elongation factor S-II (and elsewhere)       | TFS2M      | TFIIS_M      | PF07500 |
| Bacterial DNA topoisomerase I DNA-binding domain                                            | TOP1Ac     | Topoisom_bac | PF01131 |
| Bacterial DNA topoisomeraes I ATP-binding domain                                            | TOP1Bc     | Topoisom_bac | PF01131 |
| DNA Topoisomerase I (eukaryota)                                                             | TOPEUc     | Topoisom_I   | PF01028 |
| TOPRIM                                                                                      | TOPRIM     | Toprim       | PF01751 |
| Xeroderma pigmentosum G I-region                                                            | XPGI       | XPG_I        | PF00867 |
| Xeroderma pigmentosum G N-region                                                            | XPGN       | XPG_N        | PF00752 |
| Z-DNA-binding domain in adenosine deaminases                                                | Zalpha     | z-alpha      | PF02295 |
| BED zinc finger                                                                             | ZnF_BED    | zf-BED       | PF02892 |
| C2C2 Zinc finger                                                                            | ZnF_C2C2   | TFIIS_C      | PF01096 |
| Zinc finger                                                                                 | ZnF_C2H2   | zf-C2H2      | PF00096 |
| Zinc finger                                                                                 | ZnF_C2HC   | zf-C2HC      | PF00098 |
| Zinc finger                                                                                 | ZnF_C3H1   | zf-CCCH      | PF00642 |
| C4 zinc finger in nuclear hormone receptors                                                 | ZnF_C4     | zf-C4        | PF00105 |
| Zinc finger                                                                                 | ZnF_CHCC   | zf-CHC2      | PF01807 |
| Zinc finger in DBF-like proteins                                                            | ZnF_DBF    | zf-DBF       | PF07535 |
| Zinc finger binding to DNA consensus sequence [AT]GATA[AG]                                  | ZnF_GATA   | GATA         | PF00320 |
| Plant mutator transposase zinc finger                                                       | ZnF_PMZ    | SWIM         | PF04434 |
