# Supplementary material for: Identification and correction of abnormal, incomplete and mispredicted proteins in public databases
Source: PubMed Central journal article supplement (PMC2542381; doi:10.1186/1471-2105-9-353), 2008-08-27
Supplement: 1471-2105-9-353-S6.pdf [file 1471-2105-9-353-S6.pdf]

**Additional file 6. List of Pfam-A domain families suitable for the study of domain integrity.** The table contains Pfam-A domain families present in human, vertebrate and metazoa+fungi Swiss-Prot proteins that have a well-defined, conserved sequence length range and thus proved to be suitable for the study of domain integrity. The detailed description of the identification of Pfam-A families suitable for the study of the domain integrity is found in Additional file 1, Part 2.

| Human Pfam ID |         |         |         |         |         |         |         |         |         |         |         |         |
|---------------|---------|---------|---------|---------|---------|---------|---------|---------|---------|---------|---------|---------|
| PF00001       | PF00323 | PF00694 | PF01119 | PF01549 | PF02171 | PF02823 | PF03487 | PF04263 | PF05060 | PF05997 | PF07169 | PF08202 |
| PF00005       | PF00324 | PF00696 | PF01120 | PF01551 | PF02172 | PF02824 | PF03489 | PF04265 | PF05063 | PF06001 | PF07175 | PF08204 |
| PF00006       | PF00326 | PF00698 | PF01121 | PF01553 | PF02173 | PF02825 | PF03491 | PF04272 | PF05064 | PF06008 | PF07177 | PF08210 |
| PF00009       | PF00327 | PF00704 | PF01122 | PF01556 | PF02174 | PF02826 | PF03493 | PF04275 | PF05071 | PF06009 | PF07189 | PF08213 |
| PF00010       | PF00328 | PF00705 | PF01124 | PF01557 | PF02177 | PF02827 | PF03494 | PF04280 | PF05076 | PF06010 | PF07202 | PF08215 |
| PF00013       | PF00329 | PF00708 | PF01125 | PF01562 | PF02178 | PF02828 | PF03501 | PF04300 | PF05083 | PF06012 | PF07221 | PF08216 |
| PF00014       | PF00330 | PF00709 | PF01126 | PF01564 | PF02179 | PF02836 | PF03508 | PF04376 | PF05089 | PF06017 | PF07225 | PF08221 |
| PF00017       | PF00333 | PF00711 | PF01127 | PF01565 | PF02180 | PF02837 | PF03509 | PF04377 | PF05090 | PF06025 | PF07260 | PF08232 |
| PF00019       | PF00334 | PF00714 | PF01129 | PF01566 | PF02181 | PF02838 | PF03511 | PF04379 | PF05091 | PF06026 | PF07263 | PF08235 |
| PF00021       | PF00335 | PF00715 | PF01130 | PF01569 | PF02182 | PF02840 | PF03516 | PF04382 | PF05093 | PF06031 | PF07264 | PF08240 |
| PF00024       | PF00337 | PF00717 | PF01131 | PF01571 | PF02184 | PF02841 | PF03517 | PF04388 | PF05104 | PF06046 | PF07281 | PF08241 |
| PF00025       | PF00338 | PF00719 | PF01133 | PF01575 | PF02185 | PF02843 | PF03520 | PF04389 | PF05110 | PF06049 | PF07286 | PF08242 |
| PF00026       | PF00339 | PF00727 | PF01134 | PF01582 | PF02186 | PF02844 | PF03521 | PF04406 | PF05111 | PF06052 | PF07292 | PF08246 |
| PF00027       | PF00341 | PF00728 | PF01135 | PF01583 | PF02187 | PF02845 | PF03522 | PF04408 | PF05118 | PF06058 | PF07297 | PF08264 |
| PF00029       | PF00342 | PF00731 | PF01138 | PF01585 | PF02189 | PF02847 | PF03523 | PF04410 | PF05127 | PF06060 | PF07303 | PF08265 |
| PF00030       | PF00343 | PF00732 | PF01140 | PF01586 | PF02190 | PF02852 | PF03528 | PF04419 | PF05131 | PF06068 | PF07324 | PF08266 |
| PF00032       | PF00344 | PF00733 | PF01142 | PF01588 | PF02191 | PF02854 | PF03529 | PF04420 | PF05132 | PF06071 | PF07334 | PF08271 |
| PF00033       | PF00346 | PF00735 | PF01144 | PF01590 | PF02192 | PF02862 | PF03530 | PF04421 | PF05147 | PF06079 | PF07347 | PF08279 |
| PF00034       | PF00347 | PF00736 | PF01146 | PF01591 | PF02194 | PF02864 | PF03531 | PF04423 | PF05148 | PF06083 | PF07353 | PF08285 |
| PF00037       | PF00348 | PF00743 | PF01148 | PF01592 | PF02196 | PF02865 | PF03533 | PF04427 | PF05153 | PF06087 | PF07354 | PF08288 |
| PF00038       | PF00349 | PF00748 | PF01150 | PF01596 | PF02197 | PF02866 | PF03535 | PF04433 | PF05158 | PF06105 | PF07359 | PF08292 |
| PF00039       | PF00350 | PF00749 | PF01151 | PF01597 | PF02198 | PF02867 | PF03540 | PF04434 | PF05160 | PF06119 | PF07400 | PF08295 |
| PF00040       | PF00351 | PF00750 | PF01153 | PF01598 | PF02199 | PF02870 | PF03542 | PF04437 | PF05162 | PF06121 | PF07406 | PF08311 |
| PF00042       | PF00352 | PF00751 | PF01154 | PF01599 | PF02201 | PF02872 | PF03546 | PF04438 | PF05181 | PF06140 | PF07412 | PF08313 |

|         |         |         |         |         |         |         |         |         |         |         |         |         |
|---------|---------|---------|---------|---------|---------|---------|---------|---------|---------|---------|---------|---------|
| PF00044 | PF00354 | PF00752 | PF01157 | PF01602 | PF02202 | PF02874 | PF03547 | PF04440 | PF05184 | PF06148 | PF07421 | PF08318 |
| PF00045 | PF00355 | PF00753 | PF01158 | PF01603 | PF02204 | PF02875 | PF03556 | PF04442 | PF05185 | PF06179 | PF07443 | PF08321 |
| PF00046 | PF00357 | PF00755 | PF01159 | PF01608 | PF02205 | PF02877 | PF03561 | PF04487 | PF05186 | PF06189 | PF07448 | PF08324 |
| PF00048 | PF00361 | PF00756 | PF01160 | PF01619 | PF02207 | PF02879 | PF03567 | PF04488 | PF05187 | PF06201 | PF07452 | PF08326 |
| PF00049 | PF00362 | PF00757 | PF01161 | PF01624 | PF02208 | PF02880 | PF03568 | PF04494 | PF05188 | PF06202 | PF07458 | PF08327 |
| PF00050 | PF00363 | PF00758 | PF01162 | PF01625 | PF02209 | PF02881 | PF03571 | PF04495 | PF05189 | PF06209 | PF07469 | PF08332 |
| PF00051 | PF00364 | PF00762 | PF01163 | PF01630 | PF02212 | PF02882 | PF03572 | PF04503 | PF05190 | PF06211 | PF07474 | PF08333 |
| PF00052 | PF00365 | PF00763 | PF01166 | PF01633 | PF02213 | PF02883 | PF03577 | PF04505 | PF05191 | PF06212 | PF07479 | PF08336 |
| PF00054 | PF00366 | PF00764 | PF01167 | PF01642 | PF02214 | PF02885 | PF03587 | PF04511 | PF05193 | PF06214 | PF07496 | PF08337 |
| PF00055 | PF00368 | PF00766 | PF01168 | PF01652 | PF02218 | PF02887 | PF03600 | PF04515 | PF05195 | PF06218 | PF07500 | PF08344 |
| PF00056 | PF00370 | PF00769 | PF01170 | PF01655 | PF02219 | PF02888 | PF03604 | PF04538 | PF05196 | PF06220 | PF07502 | PF08351 |
| PF00058 | PF00375 | PF00773 | PF01172 | PF01661 | PF02221 | PF02889 | PF03607 | PF04547 | PF05199 | PF06221 | PF07521 | PF08357 |
| PF00060 | PF00377 | PF00774 | PF01175 | PF01663 | PF02223 | PF02891 | PF03615 | PF04548 | PF05207 | PF06229 | PF07522 | PF08365 |
| PF00062 | PF00378 | PF00777 | PF01176 | PF01667 | PF02225 | PF02892 | PF03619 | PF04549 | PF05208 | PF06237 | PF07524 | PF08368 |
| PF00066 | PF00380 | PF00778 | PF01179 | PF01669 | PF02229 | PF02893 | PF03623 | PF04553 | PF05222 | PF06248 | PF07525 | PF08373 |
| PF00068 | PF00382 | PF00779 | PF01180 | PF01687 | PF02230 | PF02897 | PF03630 | PF04557 | PF05236 | PF06268 | PF07527 | PF08374 |
| PF00072 | PF00383 | PF00780 | PF01182 | PF01694 | PF02233 | PF02898 | PF03635 | PF04558 | PF05237 | PF06292 | PF07528 | PF08375 |
| PF00074 | PF00384 | PF00781 | PF01186 | PF01699 | PF02234 | PF02902 | PF03637 | PF04560 | PF05240 | PF06294 | PF07529 | PF08377 |
| PF00075 | PF00385 | PF00782 | PF01187 | PF01702 | PF02237 | PF02910 | PF03643 | PF04561 | PF05241 | PF06297 | PF07531 | PF08383 |
| PF00077 | PF00386 | PF00784 | PF01189 | PF01704 | PF02238 | PF02911 | PF03645 | PF04565 | PF05250 | PF06309 | PF07533 | PF08384 |
| PF00080 | PF00387 | PF00786 | PF01191 | PF01709 | PF02244 | PF02913 | PF03647 | PF04566 | PF05251 | PF06311 | PF07539 | PF08385 |
| PF00081 | PF00388 | PF00787 | PF01192 | PF01712 | PF02245 | PF02919 | PF03651 | PF04567 | PF05253 | PF06312 | PF07540 | PF08389 |
| PF00082 | PF00390 | PF00789 | PF01194 | PF01713 | PF02251 | PF02920 | PF03660 | PF04568 | PF05254 | PF06320 | PF07541 | PF08390 |
| PF00083 | PF00393 | PF00790 | PF01198 | PF01715 | PF02252 | PF02921 | PF03661 | PF04571 | PF05255 | PF06327 | PF07542 | PF08391 |
| PF00084 | PF00394 | PF00791 | PF01199 | PF01722 | PF02257 | PF02922 | PF03665 | PF04572 | PF05276 | PF06328 | PF07545 | PF08393 |
| PF00085 | PF00396 | PF00792 | PF01200 | PF01725 | PF02259 | PF02928 | PF03666 | PF04573 | PF05279 | PF06331 | PF07546 | PF08397 |
| PF00088 | PF00397 | PF00794 | PF01201 | PF01729 | PF02260 | PF02931 | PF03669 | PF04579 | PF05281 | PF06333 | PF07562 | PF08399 |
| PF00090 | PF00398 | PF00795 | PF01202 | PF01731 | PF02262 | PF02932 | PF03670 | PF04587 | PF05282 | PF06337 | PF07565 | PF08403 |
| PF00091 | PF00401 | PF00797 | PF01204 | PF01733 | PF02267 | PF02933 | PF03671 | PF04588 | PF05283 | PF06345 | PF07569 | PF08412 |
| PF00092 | PF00402 | PF00801 | PF01207 | PF01734 | PF02268 | PF02934 | PF03676 | PF04589 | PF05287 | PF06350 | PF07571 | PF08418 |
| PF00093 | PF00403 | PF00804 | PF01208 | PF01735 | PF02269 | PF02935 | PF03690 | PF04592 | PF05291 | PF06365 | PF07576 | PF08420 |
| PF00094 | PF00405 | PF00805 | PF01210 | PF01740 | PF02270 | PF02936 | PF03694 | PF04593 | PF05292 | PF06367 | PF07593 | PF08423 |

|         |         |         |         |         |         |         |         |         |         |         |         |         |
|---------|---------|---------|---------|---------|---------|---------|---------|---------|---------|---------|---------|---------|
| PF00095 | PF00408 | PF00806 | PF01213 | PF01743 | PF02271 | PF02937 | PF03700 | PF04597 | PF05296 | PF06372 | PF07647 | PF08424 |
| PF00096 | PF00410 | PF00808 | PF01214 | PF01747 | PF02272 | PF02939 | PF03712 | PF04598 | PF05300 | PF06373 | PF07648 | PF08429 |
| PF00098 | PF00411 | PF00809 | PF01215 | PF01749 | PF02274 | PF02946 | PF03715 | PF04614 | PF05303 | PF06374 | PF07649 | PF08430 |
| PF00105 | PF00412 | PF00810 | PF01216 | PF01751 | PF02275 | PF02947 | PF03719 | PF04615 | PF05324 | PF06375 | PF07650 | PF08433 |
| PF00106 | PF00414 | PF00812 | PF01217 | PF01753 | PF02284 | PF02953 | PF03720 | PF04617 | PF05326 | PF06384 | PF07651 | PF08441 |
| PF00107 | PF00416 | PF00814 | PF01218 | PF01754 | PF02285 | PF02961 | PF03721 | PF04621 | PF05328 | PF06387 | PF07657 | PF08442 |
| PF00108 | PF00418 | PF00817 | PF01221 | PF01756 | PF02290 | PF02965 | PF03725 | PF04627 | PF05337 | PF06391 | PF07662 | PF08447 |
| PF00109 | PF00420 | PF00821 | PF01222 | PF01758 | PF02291 | PF02966 | PF03726 | PF04628 | PF05347 | PF06393 | PF07670 | PF08449 |
| PF00111 | PF00428 | PF00822 | PF01223 | PF01759 | PF02296 | PF02969 | PF03727 | PF04629 | PF05349 | PF06396 | PF07677 | PF08450 |
| PF00112 | PF00433 | PF00826 | PF01227 | PF01762 | PF02301 | PF02970 | PF03730 | PF04636 | PF05350 | PF06399 | PF07678 | PF08451 |
| PF00113 | PF00436 | PF00827 | PF01229 | PF01765 | PF02310 | PF02971 | PF03731 | PF04641 | PF05351 | PF06400 | PF07684 | PF08454 |
| PF00115 | PF00439 | PF00828 | PF01230 | PF01770 | PF02312 | PF02978 | PF03735 | PF04643 | PF05355 | PF06401 | PF07687 | PF08466 |
| PF00116 | PF00441 | PF00831 | PF01231 | PF01773 | PF02318 | PF02984 | PF03736 | PF04644 | PF05361 | PF06418 | PF07699 | PF08473 |
| PF00117 | PF00444 | PF00832 | PF01233 | PF01775 | PF02319 | PF02985 | PF03747 | PF04652 | PF05362 | PF06419 | PF07700 | PF08474 |
| PF00118 | PF00445 | PF00833 | PF01234 | PF01776 | PF02320 | PF02990 | PF03758 | PF04658 | PF05365 | PF06424 | PF07701 | PF08477 |
| PF00119 | PF00446 | PF00834 | PF01237 | PF01777 | PF02330 | PF02991 | PF03764 | PF04664 | PF05366 | PF06427 | PF07703 | PF08487 |
| PF00120 | PF00447 | PF00835 | PF01238 | PF01778 | PF02337 | PF02996 | PF03765 | PF04667 | PF05378 | PF06428 | PF07706 | PF08490 |
| PF00121 | PF00448 | PF00836 | PF01239 | PF01779 | PF02338 | PF03002 | PF03770 | PF04675 | PF05383 | PF06432 | PF07710 | PF08491 |
| PF00123 | PF00450 | PF00837 | PF01242 | PF01780 | PF02344 | PF03006 | PF03781 | PF04679 | PF05386 | PF06441 | PF07711 | PF08492 |
| PF00125 | PF00452 | PF00838 | PF01243 | PF01781 | PF02345 | PF03009 | PF03792 | PF04680 | PF05392 | PF06444 | PF07716 | PF08499 |
| PF00129 | PF00454 | PF00839 | PF01244 | PF01784 | PF02347 | PF03016 | PF03798 | PF04683 | PF05395 | PF06446 | PF07717 | PF08504 |
| PF00130 | PF00458 | PF00850 | PF01245 | PF01791 | PF02348 | PF03020 | PF03803 | PF04691 | PF05399 | PF06448 | PF07718 | PF08506 |
| PF00131 | PF00459 | PF00852 | PF01246 | PF01794 | PF02350 | PF03024 | PF03807 | PF04692 | PF05404 | PF06455 | PF07719 | PF08510 |
| PF00132 | PF00462 | PF00853 | PF01247 | PF01798 | PF02351 | PF03028 | PF03810 | PF04695 | PF05405 | PF06456 | PF07722 | PF08513 |
| PF00133 | PF00464 | PF00855 | PF01248 | PF01799 | PF02354 | PF03029 | PF03813 | PF04696 | PF05406 | PF06459 | PF07723 | PF08514 |
| PF00135 | PF00466 | PF00856 | PF01249 | PF01803 | PF02359 | PF03031 | PF03815 | PF04697 | PF05422 | PF06461 | PF07724 | PF08515 |
| PF00136 | PF00467 | PF00858 | PF01251 | PF01805 | PF02366 | PF03034 | PF03820 | PF04698 | PF05427 | PF06462 | PF07731 | PF08516 |
| PF00137 | PF00468 | PF00860 | PF01253 | PF01808 | PF02372 | PF03036 | PF03821 | PF04699 | PF05428 | PF06463 | PF07732 | PF08517 |
| PF00143 | PF00472 | PF00861 | PF01254 | PF01812 | PF02373 | PF03039 | PF03823 | PF04704 | PF05434 | PF06464 | PF07738 | PF08518 |
| PF00144 | PF00473 | PF00864 | PF01255 | PF01813 | PF02374 | PF03045 | PF03826 | PF04706 | PF05438 | PF06465 | PF07741 | PF08519 |
| PF00145 | PF00474 | PF00865 | PF01257 | PF01821 | PF02375 | PF03051 | PF03827 | PF04707 | PF05439 | PF06466 | PF07742 | PF08523 |
| PF00146 | PF00476 | PF00867 | PF01259 | PF01822 | PF02376 | PF03054 | PF03828 | PF04709 | PF05450 | PF06467 | PF07743 | PF08526 |

|         |         |         |         |         |         |         |         |         |         |         |         |         |
|---------|---------|---------|---------|---------|---------|---------|---------|---------|---------|---------|---------|---------|
| PF00149 | PF00479 | PF00868 | PF01262 | PF01823 | PF02377 | PF03055 | PF03832 | PF04710 | PF05454 | PF06468 | PF07744 | PF08527 |
| PF00151 | PF00480 | PF00870 | PF01263 | PF01826 | PF02383 | PF03056 | PF03834 | PF04711 | PF05456 | PF06469 | PF07748 | PF08534 |
| PF00152 | PF00481 | PF00879 | PF01265 | PF01833 | PF02389 | PF03061 | PF03835 | PF04716 | PF05458 | PF06470 | PF07749 | PF08540 |
| PF00153 | PF00485 | PF00883 | PF01267 | PF01834 | PF02390 | PF03062 | PF03836 | PF04718 | PF05460 | PF06472 | PF07763 | PF08542 |
| PF00155 | PF00487 | PF00884 | PF01268 | PF01835 | PF02391 | PF03068 | PF03847 | PF04719 | PF05461 | PF06479 | PF07766 | PF08544 |
| PF00156 | PF00488 | PF00886 | PF01269 | PF01839 | PF02394 | PF03073 | PF03849 | PF04724 | PF05463 | PF06480 | PF07767 |         |
| PF00157 | PF00489 | PF00887 | PF01271 | PF01840 | PF02403 | PF03074 | PF03850 | PF04727 | PF05466 | PF06482 | PF07776 |         |
| PF00159 | PF00490 | PF00889 | PF01273 | PF01841 | PF02404 | PF03081 | PF03868 | PF04731 | PF05470 | PF06487 | PF07778 |         |
| PF00160 | PF00491 | PF00890 | PF01275 | PF01842 | PF02412 | PF03088 | PF03870 | PF04732 | PF05474 | PF06512 | PF07782 |         |
| PF00162 | PF00493 | PF00891 | PF01279 | PF01843 | PF02423 | PF03089 | PF03871 | PF04733 | PF05477 | PF06524 | PF07807 |         |
| PF00163 | PF00494 | PF00895 | PF01280 | PF01846 | PF02434 | PF03091 | PF03874 | PF04739 | PF05478 | PF06534 | PF07808 |         |
| PF00166 | PF00498 | PF00896 | PF01281 | PF01847 | PF02436 | PF03095 | PF03875 | PF04749 | PF05483 | PF06535 | PF07810 |         |
| PF00169 | PF00499 | PF00899 | PF01282 | PF01852 | PF02437 | PF03096 | PF03876 | PF04750 | PF05485 | PF06540 | PF07815 |         |
| PF00171 | PF00503 | PF00900 | PF01283 | PF01853 | PF02441 | PF03097 | PF03896 | PF04756 | PF05486 | PF06544 | PF07830 |         |
| PF00173 | PF00507 | PF00903 | PF01284 | PF01857 | PF02450 | PF03099 | PF03900 | PF04757 | PF05493 | PF06546 | PF07831 |         |
| PF00174 | PF00510 | PF00904 | PF01285 | PF01858 | PF02453 | PF03102 | PF03901 | PF04758 | PF05495 | PF06553 | PF07834 |         |
| PF00175 | PF00520 | PF00907 | PF01286 | PF01868 | PF02460 | PF03104 | PF03908 | PF04762 | PF05499 | PF06554 | PF07837 |         |
| PF00177 | PF00521 | PF00909 | PF01287 | PF01869 | PF02466 | PF03109 | PF03909 | PF04768 | PF05502 | PF06566 | PF07842 |         |
| PF00178 | PF00525 | PF00916 | PF01290 | PF01871 | PF02469 | PF03114 | PF03911 | PF04774 | PF05507 | PF06567 | PF07847 |         |
| PF00179 | PF00530 | PF00917 | PF01291 | PF01873 | PF02485 | PF03127 | PF03914 | PF04775 | PF05510 | PF06573 | PF07850 |         |
| PF00180 | PF00531 | PF00918 | PF01294 | PF01875 | PF02487 | PF03128 | PF03919 | PF04777 | PF05511 | PF06581 | PF07859 |         |
| PF00181 | PF00534 | PF00919 | PF01299 | PF01876 | PF02493 | PF03129 | PF03920 | PF04790 | PF05517 | PF06583 | PF07883 |         |
| PF00184 | PF00538 | PF00923 | PF01302 | PF01896 | PF02494 | PF03131 | PF03921 | PF04795 | PF05529 | PF06588 | PF07884 |         |
| PF00185 | PF00542 | PF00928 | PF01315 | PF01900 | PF02513 | PF03133 | PF03931 | PF04799 | PF05557 | PF06602 | PF07885 |         |
| PF00186 | PF00549 | PF00929 | PF01323 | PF01907 | PF02515 | PF03134 | PF03932 | PF04800 | PF05571 | PF06607 | PF07894 |         |
| PF00188 | PF00550 | PF00930 | PF01327 | PF01909 | PF02516 | PF03143 | PF03939 | PF04801 | PF05572 | PF06608 | PF07904 |         |
| PF00189 | PF00551 | PF00931 | PF01329 | PF01912 | PF02517 | PF03144 | PF03941 | PF04803 | PF05577 | PF06614 | PF07912 |         |
| PF00191 | PF00552 | PF00935 | PF01331 | PF01916 | PF02525 | PF03145 | PF03943 | PF04810 | PF05586 | PF06617 | PF07915 |         |
| PF00193 | PF00554 | PF00939 | PF01335 | PF01918 | PF02535 | PF03146 | PF03946 | PF04811 | PF05587 | PF06621 | PF07923 |         |
| PF00194 | PF00557 | PF00940 | PF01336 | PF01922 | PF02536 | PF03148 | PF03947 | PF04812 | PF05600 | PF06623 | PF07926 |         |
| PF00198 | PF00560 | PF00941 | PF01342 | PF01923 | PF02538 | PF03149 | PF03949 | PF04813 | PF05604 | PF06625 | PF07928 |         |
| PF00199 | PF00562 | PF00953 | PF01347 | PF01926 | PF02544 | PF03151 | PF03950 | PF04814 | PF05622 | PF06631 | PF07933 |         |

|         |         |         |         |         |         |         |         |         |         |         |         |
|---------|---------|---------|---------|---------|---------|---------|---------|---------|---------|---------|---------|
| PF00201 | PF00564 | PF00955 | PF01351 | PF01928 | PF02545 | PF03152 | PF03952 | PF04815 | PF05640 | PF06632 | PF07934 |
| PF00202 | PF00566 | PF00956 | PF01354 | PF01929 | PF02567 | PF03153 | PF03953 | PF04818 | PF05641 | PF06637 | PF07941 |
| PF00203 | PF00568 | PF00957 | PF01363 | PF01937 | PF02574 | PF03155 | PF03954 | PF04819 | PF05645 | PF06638 | PF07942 |
| PF00204 | PF00569 | PF00958 | PF01365 | PF01938 | PF02578 | PF03159 | PF03957 | PF04821 | PF05648 | PF06645 | PF07959 |
| PF00205 | PF00570 | PF00962 | PF01369 | PF01963 | PF02580 | PF03160 | PF03966 | PF04822 | PF05649 | PF06650 | PF07965 |
| PF00206 | PF00571 | PF00965 | PF01379 | PF01965 | PF02585 | PF03165 | PF03981 | PF04824 | PF05652 | PF06657 | PF07966 |
| PF00207 | PF00572 | PF00969 | PF01380 | PF01966 | PF02594 | PF03166 | PF03991 | PF04825 | PF05653 | PF06662 | PF07967 |
| PF00208 | PF00573 | PF00970 | PF01381 | PF01967 | PF02597 | PF03167 | PF03992 | PF04831 | PF05669 | PF06663 | PF07970 |
| PF00209 | PF00574 | PF00975 | PF01387 | PF01968 | PF02602 | PF03171 | PF03997 | PF04836 | PF05670 | PF06668 | PF07973 |
| PF00210 | PF00575 | PF00976 | PF01388 | PF01974 | PF02607 | PF03172 | PF03998 | PF04840 | PF05676 | PF06677 | PF07974 |
| PF00211 | PF00576 | PF00984 | PF01390 | PF01979 | PF02617 | PF03177 | PF04003 | PF04841 | PF05679 | PF06699 | PF07975 |
| PF00212 | PF00578 | PF00988 | PF01392 | PF01981 | PF02628 | PF03178 | PF04006 | PF04845 | PF05680 | PF06701 | PF07978 |
| PF00213 | PF00579 | PF00992 | PF01393 | PF01984 | PF02629 | PF03179 | PF04031 | PF04847 | PF05682 | PF06702 | PF07985 |
| PF00214 | PF00581 | PF00993 | PF01394 | PF01990 | PF02630 | PF03184 | PF04032 | PF04855 | PF05693 | PF06703 | PF07986 |
| PF00215 | PF00584 | PF00994 | PF01396 | PF01991 | PF02637 | PF03185 | PF04037 | PF04856 | PF05694 | PF06726 | PF07988 |
| PF00217 | PF00586 | PF00996 | PF01398 | PF01992 | PF02666 | PF03188 | PF04042 | PF04858 | PF05699 | PF06728 | PF07989 |
| PF00219 | PF00587 | PF00997 | PF01399 | PF01997 | PF02668 | PF03194 | PF04044 | PF04868 | PF05700 | PF06729 | PF08005 |
| PF00220 | PF00590 | PF00999 | PF01400 | PF02002 | PF02671 | PF03199 | PF04045 | PF04869 | PF05706 | PF06732 | PF08016 |
| PF00221 | PF00591 | PF01000 | PF01401 | PF02005 | PF02678 | PF03200 | PF04046 | PF04871 | PF05712 | PF06733 | PF08022 |
| PF00224 | PF00594 | PF01007 | PF01403 | PF02008 | PF02686 | PF03208 | PF04047 | PF04874 | PF05715 | PF06741 | PF08030 |
| PF00225 | PF00596 | PF01008 | PF01404 | PF02012 | PF02709 | PF03215 | PF04049 | PF04882 | PF05719 | PF06743 | PF08033 |
| PF00227 | PF00605 | PF01012 | PF01408 | PF02014 | PF02724 | PF03223 | PF04050 | PF04886 | PF05721 | PF06747 | PF08035 |
| PF00229 | PF00607 | PF01015 | PF01409 | PF02017 | PF02727 | PF03224 | PF04051 | PF04900 | PF05724 | PF06752 | PF08038 |
| PF00230 | PF00609 | PF01016 | PF01410 | PF02019 | PF02728 | PF03226 | PF04053 | PF04901 | PF05726 | PF06773 | PF08039 |
| PF00231 | PF00610 | PF01017 | PF01411 | PF02020 | PF02729 | PF03227 | PF04055 | PF04902 | PF05729 | PF06775 | PF08040 |
| PF00232 | PF00611 | PF01018 | PF01412 | PF02022 | PF02731 | PF03232 | PF04056 | PF04904 | PF05731 | PF06777 | PF08059 |
| PF00233 | PF00612 | PF01020 | PF01413 | PF02025 | PF02732 | PF03234 | PF04057 | PF04905 | PF05735 | PF06783 | PF08060 |
| PF00235 | PF00613 | PF01023 | PF01414 | PF02026 | PF02735 | PF03247 | PF04062 | PF04908 | PF05739 | PF06784 | PF08061 |
| PF00236 | PF00614 | PF01025 | PF01415 | PF02036 | PF02736 | PF03248 | PF04065 | PF04909 | PF05741 | PF06807 | PF08062 |
| PF00237 | PF00616 | PF01026 | PF01416 | PF02037 | PF02737 | PF03250 | PF04068 | PF04910 | PF05743 | PF06809 | PF08063 |
| PF00238 | PF00617 | PF01027 | PF01417 | PF02038 | PF02738 | PF03253 | PF04072 | PF04912 | PF05746 | PF06814 | PF08064 |
| PF00241 | PF00618 | PF01028 | PF01419 | PF02039 | PF02740 | PF03256 | PF04081 | PF04921 | PF05753 | PF06816 | PF08065 |

|         |         |         |         |         |         |         |         |         |         |         |         |
|---------|---------|---------|---------|---------|---------|---------|---------|---------|---------|---------|---------|
| PF00243 | PF00619 | PF01030 | PF01421 | PF02044 | PF02743 | PF03259 | PF04083 | PF04923 | PF05756 | PF06817 | PF08066 |
| PF00244 | PF00620 | PF01031 | PF01422 | PF02046 | PF02744 | PF03261 | PF04084 | PF04926 | PF05760 | PF06818 | PF08067 |
| PF00245 | PF00621 | PF01033 | PF01424 | PF02055 | PF02747 | PF03265 | PF04086 | PF04928 | PF05761 | PF06821 | PF08068 |
| PF00246 | PF00622 | PF01035 | PF01425 | PF02057 | PF02749 | PF03266 | PF04088 | PF04934 | PF05764 | PF06825 | PF08069 |
| PF00248 | PF00623 | PF01039 | PF01426 | PF02058 | PF02750 | PF03271 | PF04089 | PF04935 | PF05773 | PF06828 | PF08070 |
| PF00249 | PF00627 | PF01040 | PF01428 | PF02059 | PF02751 | PF03285 | PF04091 | PF04938 | PF05778 | PF06831 | PF08071 |
| PF00250 | PF00629 | PF01042 | PF01429 | PF02064 | PF02752 | PF03297 | PF04095 | PF04939 | PF05781 | PF06839 | PF08072 |
| PF00253 | PF00631 | PF01048 | PF01431 | PF02070 | PF02755 | PF03298 | PF04096 | PF04950 | PF05782 | PF06858 | PF08073 |
| PF00255 | PF00632 | PF01053 | PF01432 | PF02071 | PF02757 | PF03299 | PF04097 | PF04952 | PF05783 | PF06870 | PF08074 |
| PF00256 | PF00633 | PF01055 | PF01434 | PF02072 | PF02758 | PF03301 | PF04098 | PF04959 | PF05786 | PF06875 | PF08075 |
| PF00258 | PF00634 | PF01056 | PF01435 | PF02077 | PF02759 | PF03308 | PF04099 | PF04960 | PF05790 | PF06881 | PF08079 |
| PF00260 | PF00635 | PF01058 | PF01436 | PF02078 | PF02760 | PF03311 | PF04103 | PF04961 | PF05793 | PF06883 | PF08080 |
| PF00261 | PF00636 | PF01059 | PF01437 | PF02079 | PF02761 | PF03321 | PF04104 | PF04968 | PF05804 | PF06886 | PF08081 |
| PF00262 | PF00637 | PF01061 | PF01448 | PF02083 | PF02762 | PF03332 | PF04111 | PF04969 | PF05805 | PF06905 | PF08082 |
| PF00264 | PF00638 | PF01062 | PF01451 | PF02089 | PF02765 | PF03345 | PF04113 | PF04970 | PF05806 | PF06907 | PF08083 |
| PF00265 | PF00639 | PF01063 | PF01459 | PF02093 | PF02769 | PF03351 | PF04114 | PF04979 | PF05817 | PF06910 | PF08084 |
| PF00266 | PF00642 | PF01064 | PF01462 | PF02096 | PF02770 | PF03357 | PF04117 | PF04983 | PF05821 | PF06916 | PF08122 |
| PF00268 | PF00643 | PF01066 | PF01463 | PF02099 | PF02771 | PF03359 | PF04118 | PF04988 | PF05822 | PF06920 | PF08123 |
| PF00273 | PF00644 | PF01067 | PF01464 | PF02100 | PF02775 | PF03360 | PF04121 | PF04990 | PF05824 | PF06936 | PF08127 |
| PF00274 | PF00645 | PF01068 | PF01465 | PF02101 | PF02776 | PF03366 | PF04124 | PF04992 | PF05825 | PF06937 | PF08142 |
| PF00276 | PF00646 | PF01070 | PF01466 | PF02104 | PF02777 | PF03367 | PF04127 | PF04997 | PF05826 | PF06941 | PF08143 |
| PF00277 | PF00647 | PF01071 | PF01467 | PF02106 | PF02779 | PF03368 | PF04128 | PF05000 | PF05827 | PF06951 | PF08144 |
| PF00278 | PF00648 | PF01073 | PF01469 | PF02109 | PF02780 | PF03370 | PF04130 | PF05001 | PF05832 | PF06954 | PF08145 |
| PF00281 | PF00653 | PF01074 | PF01470 | PF02114 | PF02781 | PF03372 | PF04132 | PF05002 | PF05835 | PF06957 | PF08146 |
| PF00285 | PF00654 | PF01079 | PF01472 | PF02115 | PF02782 | PF03378 | PF04133 | PF05004 | PF05843 | PF06959 | PF08147 |
| PF00287 | PF00656 | PF01080 | PF01477 | PF02121 | PF02784 | PF03388 | PF04135 | PF05005 | PF05856 | PF06963 | PF08148 |
| PF00288 | PF00657 | PF01082 | PF01479 | PF02126 | PF02785 | PF03398 | PF04136 | PF05008 | PF05863 | PF06978 | PF08149 |
| PF00289 | PF00658 | PF01084 | PF01480 | PF02127 | PF02786 | PF03399 | PF04137 | PF05010 | PF05871 | PF06984 | PF08150 |
| PF00291 | PF00659 | PF01085 | PF01483 | PF02130 | PF02787 | PF03402 | PF04140 | PF05014 | PF05873 | PF06990 | PF08151 |
| PF00292 | PF00662 | PF01086 | PF01485 | PF02134 | PF02789 | PF03403 | PF04142 | PF05019 | PF05875 | PF06991 | PF08152 |
| PF00293 | PF00665 | PF01087 | PF01490 | PF02135 | PF02790 | PF03404 | PF04144 | PF05020 | PF05881 | PF07001 | PF08153 |
| PF00294 | PF00666 | PF01088 | PF01491 | PF02136 | PF02791 | PF03414 | PF04145 | PF05021 | PF05889 | PF07002 | PF08154 |

|         |         |         |         |         |         |         |         |         |         |         |         |
|---------|---------|---------|---------|---------|---------|---------|---------|---------|---------|---------|---------|
| PF00297 | PF00667 | PF01090 | PF01496 | PF02137 | PF02792 | PF03446 | PF04146 | PF05022 | PF05890 | PF07010 | PF08155 |
| PF00298 | PF00670 | PF01091 | PF01501 | PF02138 | PF02793 | PF03450 | PF04147 | PF05024 | PF05902 | PF07019 | PF08156 |
| PF00300 | PF00673 | PF01092 | PF01504 | PF02140 | PF02798 | PF03451 | PF04152 | PF05026 | PF05903 | PF07034 | PF08157 |
| PF00303 | PF00675 | PF01093 | PF01505 | PF02141 | PF02799 | PF03453 | PF04153 | PF05028 | PF05918 | PF07035 | PF08159 |
| PF00305 | PF00676 | PF01096 | PF01509 | PF02142 | PF02800 | PF03454 | PF04157 | PF05029 | PF05922 | PF07047 | PF08160 |
| PF00306 | PF00679 | PF01099 | PF01510 | PF02145 | PF02801 | PF03455 | PF04177 | PF05030 | PF05923 | PF07074 | PF08161 |
| PF00307 | PF00682 | PF01101 | PF01512 | PF02146 | PF02803 | PF03456 | PF04191 | PF05033 | PF05924 | PF07084 | PF08162 |
| PF00310 | PF00683 | PF01103 | PF01513 | PF02148 | PF02806 | PF03462 | PF04192 | PF05038 | PF05937 | PF07093 | PF08163 |
| PF00312 | PF00684 | PF01105 | PF01529 | PF02149 | PF02807 | PF03463 | PF04193 | PF05039 | PF05956 | PF07111 | PF08164 |
| PF00313 | PF00685 | PF01106 | PF01530 | PF02150 | PF02809 | PF03464 | PF04194 | PF05040 | PF05964 | PF07140 | PF08165 |
| PF00316 | PF00686 | PF01109 | PF01531 | PF02157 | PF02812 | PF03465 | PF04201 | PF05041 | PF05965 | PF07142 | PF08168 |
| PF00317 | PF00687 | PF01110 | PF01532 | PF02159 | PF02815 | PF03467 | PF04209 | PF05044 | PF05967 | PF07145 | PF08169 |
| PF00318 | PF00688 | PF01111 | PF01534 | PF02161 | PF02816 | PF03477 | PF04212 | PF05046 | PF05972 | PF07147 | PF08170 |
| PF00319 | PF00689 | PF01112 | PF01535 | PF02165 | PF02817 | PF03483 | PF04218 | PF05047 | PF05978 | PF07156 | PF08180 |
| PF00320 | PF00690 | PF01114 | PF01536 | PF02167 | PF02820 | PF03484 | PF04253 | PF05051 | PF05983 | PF07159 | PF08185 |
| PF00322 | PF00692 | PF01115 | PF01545 | PF02170 | PF02822 | PF03485 | PF04258 | PF05053 | PF05995 | PF07163 | PF08198 |

| Vertebrate<br>Pfam ID |         |         |         |         |         |         |         |         |         |         |         |         |
|-----------------------|---------|---------|---------|---------|---------|---------|---------|---------|---------|---------|---------|---------|
| PF00005               | PF00342 | PF00753 | PF01162 | PF01633 | PF02229 | PF02910 | PF03630 | PF04548 | PF05240 | PF06248 | PF07524 | PF08327 |
| PF00006               | PF00343 | PF00755 | PF01163 | PF01642 | PF02230 | PF02911 | PF03635 | PF04549 | PF05241 | PF06268 | PF07525 | PF08332 |
| PF00009               | PF00344 | PF00756 | PF01166 | PF01652 | PF02233 | PF02913 | PF03637 | PF04553 | PF05242 | PF06292 | PF07527 | PF08333 |
| PF00010               | PF00346 | PF00758 | PF01167 | PF01655 | PF02234 | PF02919 | PF03643 | PF04557 | PF05250 | PF06294 | PF07528 | PF08336 |
| PF00013               | PF00347 | PF00762 | PF01168 | PF01661 | PF02237 | PF02920 | PF03645 | PF04558 | PF05251 | PF06297 | PF07529 | PF08337 |
| PF00014               | PF00348 | PF00763 | PF01169 | PF01663 | PF02238 | PF02921 | PF03647 | PF04560 | PF05253 | PF06309 | PF07531 | PF08344 |
| PF00017               | PF00349 | PF00764 | PF01170 | PF01667 | PF02244 | PF02922 | PF03651 | PF04561 | PF05254 | PF06311 | PF07533 | PF08351 |
| PF00019               | PF00350 | PF00766 | PF01172 | PF01669 | PF02245 | PF02928 | PF03660 | PF04565 | PF05255 | PF06312 | PF07539 | PF08357 |
| PF00024               | PF00351 | PF00769 | PF01175 | PF01687 | PF02251 | PF02931 | PF03661 | PF04566 | PF05276 | PF06320 | PF07540 | PF08365 |
| PF00025               | PF00352 | PF00773 | PF01176 | PF01694 | PF02252 | PF02932 | PF03665 | PF04567 | PF05279 | PF06327 | PF07541 | PF08368 |
| PF00026               | PF00354 | PF00774 | PF01179 | PF01699 | PF02257 | PF02933 | PF03666 | PF04568 | PF05281 | PF06328 | PF07542 | PF08373 |
| PF00027               | PF00355 | PF00777 | PF01180 | PF01702 | PF02259 | PF02934 | PF03669 | PF04571 | PF05282 | PF06331 | PF07545 | PF08374 |
| PF00029               | PF00357 | PF00778 | PF01182 | PF01704 | PF02260 | PF02935 | PF03670 | PF04572 | PF05283 | PF06333 | PF07546 | PF08375 |
| PF00030               | PF00362 | PF00779 | PF01187 | PF01709 | PF02262 | PF02936 | PF03671 | PF04573 | PF05287 | PF06337 | PF07562 | PF08377 |
| PF00032               | PF00364 | PF00780 | PF01189 | PF01712 | PF02267 | PF02937 | PF03676 | PF04579 | PF05291 | PF06345 | PF07565 | PF08383 |
| PF00034               | PF00365 | PF00781 | PF01191 | PF01713 | PF02268 | PF02939 | PF03690 | PF04587 | PF05292 | PF06350 | PF07569 | PF08384 |
| PF00037               | PF00366 | PF00782 | PF01192 | PF01715 | PF02269 | PF02946 | PF03694 | PF04588 | PF05296 | PF06365 | PF07571 | PF08385 |
| PF00039               | PF00368 | PF00784 | PF01194 | PF01722 | PF02270 | PF02947 | PF03700 | PF04589 | PF05298 | PF06367 | PF07576 | PF08389 |
| PF00040               | PF00370 | PF00786 | PF01198 | PF01725 | PF02271 | PF02948 | PF03712 | PF04592 | PF05300 | PF06372 | PF07593 | PF08390 |
| PF00044               | PF00375 | PF00787 | PF01199 | PF01729 | PF02272 | PF02953 | PF03715 | PF04593 | PF05303 | PF06373 | PF07646 | PF08393 |
| PF00045               | PF00377 | PF00789 | PF01200 | PF01731 | PF02274 | PF02961 | PF03719 | PF04597 | PF05324 | PF06374 | PF07647 | PF08397 |
| PF00046               | PF00378 | PF00790 | PF01201 | PF01733 | PF02275 | PF02965 | PF03720 | PF04598 | PF05326 | PF06375 | PF07649 | PF08399 |
| PF00048               | PF00382 | PF00791 | PF01202 | PF01734 | PF02284 | PF02966 | PF03721 | PF04614 | PF05328 | PF06384 | PF07650 | PF08403 |
| PF00050               | PF00383 | PF00792 | PF01204 | PF01735 | PF02285 | PF02969 | PF03725 | PF04615 | PF05337 | PF06387 | PF07651 | PF08412 |
| PF00051               | PF00384 | PF00795 | PF01207 | PF01740 | PF02290 | PF02970 | PF03726 | PF04617 | PF05347 | PF06391 | PF07657 | PF08416 |
| PF00052               | PF00385 | PF00797 | PF01208 | PF01743 | PF02291 | PF02971 | PF03727 | PF04621 | PF05349 | PF06393 | PF07662 | PF08418 |
| PF00054               | PF00386 | PF00801 | PF01210 | PF01747 | PF02296 | PF02978 | PF03730 | PF04627 | PF05350 | PF06396 | PF07670 | PF08420 |
| PF00055               | PF00388 | PF00804 | PF01213 | PF01749 | PF02301 | PF02984 | PF03731 | PF04628 | PF05351 | PF06399 | PF07677 | PF08423 |
| PF00056               | PF00390 | PF00806 | PF01214 | PF01751 | PF02310 | PF02985 | PF03735 | PF04629 | PF05355 | PF06400 | PF07678 | PF08424 |



|         |         |         |         |         |         |         |         |         |         |         |         |         |
|---------|---------|---------|---------|---------|---------|---------|---------|---------|---------|---------|---------|---------|
| PF00058 | PF00393 | PF00808 | PF01215 | PF01753 | PF02312 | PF02990 | PF03736 | PF04636 | PF05362 | PF06401 | PF07684 | PF08429 |
| PF00060 | PF00394 | PF00809 | PF01216 | PF01754 | PF02318 | PF02991 | PF03747 | PF04641 | PF05365 | PF06403 | PF07687 | PF08430 |
| PF00062 | PF00396 | PF00810 | PF01217 | PF01756 | PF02319 | PF02994 | PF03758 | PF04643 | PF05366 | PF06418 | PF07699 | PF08433 |
| PF00066 | PF00397 | PF00811 | PF01218 | PF01758 | PF02320 | PF02996 | PF03762 | PF04652 | PF05378 | PF06419 | PF07701 | PF08434 |
| PF00068 | PF00398 | PF00812 | PF01221 | PF01759 | PF02330 | PF03002 | PF03764 | PF04658 | PF05383 | PF06424 | PF07703 | PF08441 |
| PF00072 | PF00401 | PF00814 | PF01222 | PF01762 | PF02337 | PF03006 | PF03765 | PF04664 | PF05386 | PF06427 | PF07706 | PF08442 |
| PF00074 | PF00402 | PF00817 | PF01223 | PF01765 | PF02338 | PF03009 | PF03770 | PF04667 | PF05392 | PF06428 | PF07710 | PF08447 |
| PF00075 | PF00403 | PF00819 | PF01227 | PF01770 | PF02344 | PF03016 | PF03781 | PF04675 | PF05395 | PF06432 | PF07711 | PF08449 |
| PF00077 | PF00408 | PF00821 | PF01229 | PF01773 | PF02345 | PF03020 | PF03792 | PF04679 | PF05399 | PF06441 | PF07716 | PF08450 |
| PF00080 | PF00410 | PF00822 | PF01230 | PF01775 | PF02347 | PF03024 | PF03798 | PF04680 | PF05404 | PF06446 | PF07717 | PF08451 |
| PF00081 | PF00411 | PF00826 | PF01231 | PF01776 | PF02348 | PF03028 | PF03803 | PF04683 | PF05405 | PF06448 | PF07718 | PF08454 |
| PF00083 | PF00412 | PF00827 | PF01233 | PF01777 | PF02350 | PF03029 | PF03807 | PF04691 | PF05406 | PF06455 | PF07719 | PF08466 |
| PF00084 | PF00414 | PF00828 | PF01234 | PF01778 | PF02351 | PF03031 | PF03810 | PF04692 | PF05418 | PF06456 | PF07720 | PF08473 |
| PF00085 | PF00416 | PF00831 | PF01237 | PF01779 | PF02354 | PF03032 | PF03813 | PF04695 | PF05422 | PF06459 | PF07722 | PF08474 |
| PF00087 | PF00418 | PF00832 | PF01238 | PF01780 | PF02359 | PF03034 | PF03815 | PF04696 | PF05427 | PF06461 | PF07723 | PF08477 |
| PF00088 | PF00420 | PF00833 | PF01239 | PF01781 | PF02366 | PF03036 | PF03820 | PF04697 | PF05428 | PF06462 | PF07724 | PF08487 |
| PF00090 | PF00428 | PF00834 | PF01242 | PF01783 | PF02372 | PF03039 | PF03821 | PF04698 | PF05434 | PF06463 | PF07731 | PF08490 |
| PF00091 | PF00433 | PF00835 | PF01243 | PF01784 | PF02373 | PF03045 | PF03823 | PF04699 | PF05438 | PF06464 | PF07738 | PF08491 |
| PF00092 | PF00436 | PF00836 | PF01244 | PF01791 | PF02374 | PF03051 | PF03826 | PF04704 | PF05439 | PF06465 | PF07741 | PF08492 |
| PF00093 | PF00439 | PF00837 | PF01245 | PF01794 | PF02375 | PF03054 | PF03827 | PF04706 | PF05450 | PF06466 | PF07742 | PF08499 |
| PF00094 | PF00441 | PF00838 | PF01246 | PF01798 | PF02376 | PF03055 | PF03828 | PF04707 | PF05454 | PF06467 | PF07743 | PF08504 |
| PF00095 | PF00444 | PF00839 | PF01247 | PF01799 | PF02377 | PF03056 | PF03832 | PF04709 | PF05456 | PF06468 | PF07744 | PF08506 |
| PF00096 | PF00445 | PF00850 | PF01248 | PF01803 | PF02383 | PF03061 | PF03834 | PF04710 | PF05458 | PF06469 | PF07748 | PF08510 |
| PF00098 | PF00446 | PF00852 | PF01249 | PF01805 | PF02389 | PF03062 | PF03835 | PF04711 | PF05460 | PF06470 | PF07749 | PF08513 |
| PF00105 | PF00447 | PF00853 | PF01251 | PF01808 | PF02390 | PF03068 | PF03836 | PF04716 | PF05461 | PF06472 | PF07763 | PF08514 |
| PF00106 | PF00448 | PF00855 | PF01253 | PF01812 | PF02391 | PF03073 | PF03847 | PF04718 | PF05463 | PF06479 | PF07766 | PF08515 |
| PF00107 | PF00450 | PF00856 | PF01254 | PF01813 | PF02403 | PF03074 | PF03849 | PF04719 | PF05466 | PF06480 | PF07767 | PF08516 |
| PF00108 | PF00452 | PF00858 | PF01255 | PF01821 | PF02404 | PF03081 | PF03850 | PF04724 | PF05470 | PF06482 | PF07776 | PF08517 |
| PF00109 | PF00454 | PF00860 | PF01257 | PF01822 | PF02412 | PF03088 | PF03868 | PF04727 | PF05477 | PF06487 | PF07778 | PF08518 |
| PF00111 | PF00458 | PF00861 | PF01259 | PF01823 | PF02422 | PF03089 | PF03870 | PF04731 | PF05478 | PF06512 | PF07782 | PF08519 |
| PF00112 | PF00459 | PF00864 | PF01262 | PF01833 | PF02423 | PF03091 | PF03871 | PF04732 | PF05483 | PF06524 | PF07807 | PF08523 |
| PF00113 | PF00462 | PF00865 | PF01263 | PF01835 | PF02434 | PF03095 | PF03874 | PF04733 | PF05485 | PF06534 | PF07808 | PF08526 |

|         |         |         |         |         |         |         |         |         |         |         |         |         |
|---------|---------|---------|---------|---------|---------|---------|---------|---------|---------|---------|---------|---------|
| PF00115 | PF00464 | PF00867 | PF01265 | PF01839 | PF02436 | PF03096 | PF03875 | PF04739 | PF05486 | PF06535 | PF07810 | PF08527 |
| PF00116 | PF00466 | PF00868 | PF01267 | PF01840 | PF02437 | PF03097 | PF03876 | PF04749 | PF05493 | PF06540 | PF07815 | PF08534 |
| PF00117 | PF00467 | PF00870 | PF01268 | PF01841 | PF02441 | PF03099 | PF03896 | PF04750 | PF05495 | PF06544 | PF07818 | PF08540 |
| PF00118 | PF00468 | PF00875 | PF01269 | PF01842 | PF02450 | PF03102 | PF03900 | PF04756 | PF05499 | PF06546 | PF07830 | PF08542 |
| PF00119 | PF00472 | PF00879 | PF01271 | PF01843 | PF02453 | PF03104 | PF03901 | PF04757 | PF05502 | PF06553 | PF07831 | PF08544 |
| PF00120 | PF00473 | PF00883 | PF01273 | PF01846 | PF02460 | PF03109 | PF03908 | PF04758 | PF05507 | PF06554 | PF07834 |         |
| PF00121 | PF00474 | PF00884 | PF01275 | PF01847 | PF02466 | PF03127 | PF03909 | PF04762 | PF05510 | PF06566 | PF07837 |         |
| PF00123 | PF00476 | PF00886 | PF01279 | PF01852 | PF02469 | PF03128 | PF03911 | PF04768 | PF05517 | PF06567 | PF07842 |         |
| PF00125 | PF00479 | PF00887 | PF01280 | PF01853 | PF02485 | PF03129 | PF03914 | PF04774 | PF05529 | PF06573 | PF07847 |         |
| PF00129 | PF00480 | PF00889 | PF01281 | PF01857 | PF02487 | PF03131 | PF03919 | PF04775 | PF05557 | PF06581 | PF07850 |         |
| PF00130 | PF00481 | PF00890 | PF01282 | PF01858 | PF02493 | PF03133 | PF03920 | PF04777 | PF05571 | PF06583 | PF07859 |         |
| PF00131 | PF00485 | PF00891 | PF01283 | PF01868 | PF02494 | PF03134 | PF03921 | PF04790 | PF05572 | PF06588 | PF07883 |         |
| PF00132 | PF00487 | PF00895 | PF01284 | PF01869 | PF02513 | PF03143 | PF03931 | PF04795 | PF05577 | PF06602 | PF07884 |         |
| PF00135 | PF00488 | PF00896 | PF01285 | PF01871 | PF02515 | PF03144 | PF03932 | PF04799 | PF05586 | PF06608 | PF07885 |         |
| PF00136 | PF00489 | PF00899 | PF01286 | PF01873 | PF02516 | PF03145 | PF03939 | PF04800 | PF05587 | PF06614 | PF07894 |         |
| PF00137 | PF00490 | PF00900 | PF01287 | PF01875 | PF02517 | PF03146 | PF03940 | PF04801 | PF05600 | PF06621 | PF07904 |         |
| PF00144 | PF00491 | PF00903 | PF01290 | PF01876 | PF02525 | PF03148 | PF03941 | PF04803 | PF05604 | PF06623 | PF07912 |         |
| PF00145 | PF00493 | PF00904 | PF01291 | PF01896 | PF02535 | PF03149 | PF03943 | PF04810 | PF05609 | PF06625 | PF07915 |         |
| PF00146 | PF00494 | PF00907 | PF01294 | PF01900 | PF02536 | PF03151 | PF03946 | PF04811 | PF05622 | PF06631 | PF07923 |         |
| PF00149 | PF00498 | PF00909 | PF01299 | PF01907 | PF02538 | PF03152 | PF03947 | PF04812 | PF05640 | PF06632 | PF07926 |         |
| PF00151 | PF00499 | PF00916 | PF01302 | PF01909 | PF02544 | PF03153 | PF03949 | PF04813 | PF05641 | PF06637 | PF07928 |         |
| PF00152 | PF00503 | PF00917 | PF01315 | PF01912 | PF02545 | PF03155 | PF03950 | PF04814 | PF05645 | PF06638 | PF07933 |         |
| PF00153 | PF00507 | PF00919 | PF01323 | PF01916 | PF02567 | PF03159 | PF03952 | PF04815 | PF05648 | PF06645 | PF07934 |         |
| PF00156 | PF00510 | PF00923 | PF01327 | PF01918 | PF02574 | PF03160 | PF03953 | PF04818 | PF05649 | PF06650 | PF07941 |         |
| PF00157 | PF00521 | PF00928 | PF01329 | PF01922 | PF02578 | PF03165 | PF03954 | PF04819 | PF05652 | PF06657 | PF07942 |         |
| PF00159 | PF00525 | PF00929 | PF01331 | PF01923 | PF02580 | PF03166 | PF03957 | PF04821 | PF05653 | PF06662 | PF07959 |         |
| PF00160 | PF00531 | PF00930 | PF01335 | PF01926 | PF02585 | PF03167 | PF03966 | PF04822 | PF05669 | PF06663 | PF07965 |         |
| PF00162 | PF00534 | PF00931 | PF01336 | PF01928 | PF02594 | PF03171 | PF03981 | PF04824 | PF05670 | PF06668 | PF07966 |         |
| PF00163 | PF00538 | PF00932 | PF01342 | PF01929 | PF02597 | PF03172 | PF03991 | PF04825 | PF05676 | PF06677 | PF07967 |         |
| PF00166 | PF00542 | PF00935 | PF01347 | PF01937 | PF02602 | PF03177 | PF03992 | PF04831 | PF05679 | PF06699 | PF07970 |         |
| PF00169 | PF00549 | PF00939 | PF01351 | PF01938 | PF02607 | PF03178 | PF03997 | PF04836 | PF05680 | PF06701 | PF07973 |         |
| PF00171 | PF00550 | PF00940 | PF01354 | PF01958 | PF02617 | PF03179 | PF03998 | PF04840 | PF05682 | PF06702 | PF07974 |         |

|         |         |         |         |         |         |         |         |         |         |         |         |
|---------|---------|---------|---------|---------|---------|---------|---------|---------|---------|---------|---------|
| PF00173 | PF00551 | PF00941 | PF01363 | PF01963 | PF02628 | PF03184 | PF04003 | PF04841 | PF05693 | PF06703 | PF07975 |
| PF00174 | PF00552 | PF00953 | PF01365 | PF01965 | PF02629 | PF03185 | PF04006 | PF04845 | PF05694 | PF06726 | PF07978 |
| PF00175 | PF00554 | PF00955 | PF01369 | PF01966 | PF02630 | PF03188 | PF04030 | PF04847 | PF05699 | PF06728 | PF07985 |
| PF00177 | PF00557 | PF00956 | PF01379 | PF01967 | PF02637 | PF03194 | PF04031 | PF04855 | PF05700 | PF06729 | PF07986 |
| PF00178 | PF00560 | PF00957 | PF01380 | PF01968 | PF02666 | PF03199 | PF04032 | PF04856 | PF05706 | PF06732 | PF07988 |
| PF00179 | PF00562 | PF00958 | PF01381 | PF01974 | PF02668 | PF03200 | PF04037 | PF04858 | PF05712 | PF06733 | PF07989 |
| PF00180 | PF00564 | PF00962 | PF01382 | PF01979 | PF02671 | PF03208 | PF04042 | PF04868 | PF05715 | PF06741 | PF08005 |
| PF00181 | PF00566 | PF00965 | PF01387 | PF01981 | PF02678 | PF03215 | PF04044 | PF04869 | PF05719 | PF06743 | PF08016 |
| PF00184 | PF00568 | PF00969 | PF01388 | PF01984 | PF02709 | PF03223 | PF04045 | PF04871 | PF05721 | PF06747 | PF08022 |
| PF00185 | PF00569 | PF00970 | PF01390 | PF01990 | PF02724 | PF03224 | PF04046 | PF04874 | PF05724 | PF06752 | PF08023 |
| PF00186 | PF00570 | PF00975 | PF01392 | PF01991 | PF02727 | PF03226 | PF04047 | PF04882 | PF05726 | PF06753 | PF08030 |
| PF00188 | PF00571 | PF00984 | PF01393 | PF01992 | PF02728 | PF03227 | PF04049 | PF04886 | PF05729 | PF06773 | PF08033 |
| PF00189 | PF00572 | PF00988 | PF01394 | PF01997 | PF02729 | PF03232 | PF04050 | PF04900 | PF05731 | PF06775 | PF08035 |
| PF00191 | PF00573 | PF00992 | PF01396 | PF02002 | PF02731 | PF03234 | PF04051 | PF04901 | PF05735 | PF06777 | PF08038 |
| PF00193 | PF00574 | PF00993 | PF01398 | PF02005 | PF02732 | PF03247 | PF04053 | PF04902 | PF05739 | PF06783 | PF08039 |
| PF00194 | PF00575 | PF00994 | PF01399 | PF02008 | PF02735 | PF03248 | PF04055 | PF04904 | PF05741 | PF06784 | PF08040 |
| PF00198 | PF00576 | PF00996 | PF01400 | PF02012 | PF02736 | PF03250 | PF04056 | PF04905 | PF05742 | PF06807 | PF08059 |
| PF00199 | PF00578 | PF00999 | PF01401 | PF02014 | PF02737 | PF03253 | PF04057 | PF04908 | PF05743 | PF06809 | PF08060 |
| PF00201 | PF00579 | PF01000 | PF01403 | PF02017 | PF02738 | PF03256 | PF04062 | PF04909 | PF05746 | PF06814 | PF08061 |
| PF00202 | PF00581 | PF01007 | PF01404 | PF02019 | PF02740 | PF03259 | PF04065 | PF04910 | PF05753 | PF06816 | PF08062 |
| PF00203 | PF00583 | PF01008 | PF01408 | PF02020 | PF02743 | PF03261 | PF04068 | PF04912 | PF05756 | PF06817 | PF08063 |
| PF00204 | PF00584 | PF01012 | PF01409 | PF02022 | PF02744 | PF03265 | PF04072 | PF04921 | PF05760 | PF06818 | PF08064 |
| PF00205 | PF00586 | PF01014 | PF01410 | PF02025 | PF02747 | PF03266 | PF04081 | PF04923 | PF05761 | PF06821 | PF08065 |
| PF00206 | PF00587 | PF01015 | PF01411 | PF02026 | PF02749 | PF03271 | PF04083 | PF04926 | PF05764 | PF06825 | PF08066 |
| PF00207 | PF00590 | PF01016 | PF01412 | PF02036 | PF02750 | PF03285 | PF04084 | PF04934 | PF05773 | PF06828 | PF08067 |
| PF00208 | PF00591 | PF01017 | PF01413 | PF02037 | PF02751 | PF03297 | PF04086 | PF04935 | PF05778 | PF06831 | PF08068 |
| PF00209 | PF00594 | PF01018 | PF01414 | PF02039 | PF02752 | PF03299 | PF04088 | PF04938 | PF05781 | PF06839 | PF08069 |
| PF00210 | PF00596 | PF01020 | PF01415 | PF02044 | PF02755 | PF03301 | PF04089 | PF04939 | PF05782 | PF06858 | PF08070 |
| PF00211 | PF00605 | PF01023 | PF01416 | PF02046 | PF02757 | PF03308 | PF04091 | PF04950 | PF05783 | PF06870 | PF08071 |
| PF00213 | PF00609 | PF01025 | PF01417 | PF02055 | PF02758 | PF03311 | PF04095 | PF04952 | PF05786 | PF06875 | PF08072 |
| PF00214 | PF00610 | PF01026 | PF01419 | PF02057 | PF02759 | PF03321 | PF04096 | PF04959 | PF05790 | PF06881 | PF08073 |
| PF00215 | PF00611 | PF01027 | PF01421 | PF02058 | PF02760 | PF03332 | PF04097 | PF04960 | PF05793 | PF06886 | PF08074 |

|         |         |         |         |         |         |         |         |         |         |         |         |
|---------|---------|---------|---------|---------|---------|---------|---------|---------|---------|---------|---------|
| PF00217 | PF00612 | PF01028 | PF01422 | PF02059 | PF02761 | PF03345 | PF04098 | PF04961 | PF05794 | PF06905 | PF08075 |
| PF00219 | PF00613 | PF01030 | PF01424 | PF02064 | PF02762 | PF03351 | PF04099 | PF04968 | PF05804 | PF06907 | PF08079 |
| PF00220 | PF00614 | PF01031 | PF01425 | PF02071 | PF02765 | PF03357 | PF04103 | PF04969 | PF05805 | PF06910 | PF08080 |
| PF00221 | PF00616 | PF01033 | PF01426 | PF02077 | PF02769 | PF03359 | PF04104 | PF04970 | PF05806 | PF06916 | PF08081 |
| PF00224 | PF00617 | PF01035 | PF01428 | PF02078 | PF02770 | PF03360 | PF04111 | PF04979 | PF05808 | PF06920 | PF08082 |
| PF00225 | PF00618 | PF01039 | PF01431 | PF02079 | PF02771 | PF03366 | PF04113 | PF04983 | PF05817 | PF06936 | PF08083 |
| PF00227 | PF00620 | PF01040 | PF01432 | PF02083 | PF02775 | PF03367 | PF04114 | PF04988 | PF05821 | PF06937 | PF08084 |
| PF00230 | PF00621 | PF01042 | PF01434 | PF02089 | PF02776 | PF03368 | PF04117 | PF04990 | PF05822 | PF06941 | PF08103 |
| PF00231 | PF00623 | PF01048 | PF01435 | PF02093 | PF02777 | PF03370 | PF04118 | PF04992 | PF05824 | PF06951 | PF08110 |
| PF00232 | PF00626 | PF01053 | PF01436 | PF02096 | PF02779 | PF03372 | PF04121 | PF05000 | PF05826 | PF06954 | PF08121 |
| PF00233 | PF00627 | PF01055 | PF01437 | PF02099 | PF02780 | PF03378 | PF04124 | PF05001 | PF05827 | PF06957 | PF08122 |
| PF00235 | PF00629 | PF01058 | PF01448 | PF02100 | PF02781 | PF03388 | PF04127 | PF05002 | PF05832 | PF06959 | PF08123 |
| PF00236 | PF00631 | PF01059 | PF01451 | PF02101 | PF02782 | PF03398 | PF04128 | PF05004 | PF05835 | PF06963 | PF08127 |
| PF00237 | PF00632 | PF01061 | PF01459 | PF02104 | PF02784 | PF03399 | PF04130 | PF05005 | PF05843 | PF06970 | PF08131 |
| PF00238 | PF00635 | PF01062 | PF01462 | PF02106 | PF02785 | PF03402 | PF04132 | PF05008 | PF05856 | PF06978 | PF08142 |
| PF00241 | PF00636 | PF01063 | PF01463 | PF02109 | PF02786 | PF03403 | PF04133 | PF05010 | PF05863 | PF06984 | PF08143 |
| PF00243 | PF00637 | PF01064 | PF01464 | PF02114 | PF02787 | PF03404 | PF04135 | PF05014 | PF05871 | PF06990 | PF08144 |
| PF00244 | PF00638 | PF01066 | PF01465 | PF02115 | PF02789 | PF03414 | PF04136 | PF05019 | PF05873 | PF06991 | PF08145 |
| PF00245 | PF00639 | PF01067 | PF01466 | PF02121 | PF02791 | PF03441 | PF04137 | PF05020 | PF05875 | PF06994 | PF08146 |
| PF00246 | PF00642 | PF01068 | PF01467 | PF02126 | PF02792 | PF03446 | PF04140 | PF05021 | PF05881 | PF07001 | PF08147 |
| PF00248 | PF00643 | PF01070 | PF01469 | PF02127 | PF02793 | PF03447 | PF04142 | PF05022 | PF05889 | PF07002 | PF08148 |
| PF00249 | PF00644 | PF01071 | PF01470 | PF02130 | PF02799 | PF03450 | PF04144 | PF05024 | PF05890 | PF07010 | PF08149 |
| PF00250 | PF00645 | PF01073 | PF01472 | PF02134 | PF02800 | PF03451 | PF04145 | PF05026 | PF05902 | PF07019 | PF08150 |
| PF00253 | PF00646 | PF01074 | PF01477 | PF02135 | PF02801 | PF03453 | PF04146 | PF05028 | PF05903 | PF07034 | PF08151 |
| PF00255 | PF00647 | PF01079 | PF01479 | PF02136 | PF02803 | PF03454 | PF04147 | PF05029 | PF05918 | PF07035 | PF08152 |
| PF00256 | PF00648 | PF01080 | PF01480 | PF02137 | PF02806 | PF03455 | PF04152 | PF05030 | PF05922 | PF07047 | PF08153 |
| PF00258 | PF00653 | PF01082 | PF01483 | PF02138 | PF02807 | PF03456 | PF04153 | PF05033 | PF05923 | PF07074 | PF08154 |
| PF00260 | PF00654 | PF01084 | PF01485 | PF02140 | PF02809 | PF03462 | PF04157 | PF05038 | PF05924 | PF07084 | PF08155 |
| PF00261 | PF00656 | PF01085 | PF01490 | PF02141 | PF02812 | PF03463 | PF04177 | PF05039 | PF05937 | PF07093 | PF08156 |
| PF00262 | PF00657 | PF01086 | PF01491 | PF02142 | PF02815 | PF03464 | PF04191 | PF05040 | PF05956 | PF07111 | PF08157 |
| PF00264 | PF00658 | PF01087 | PF01496 | PF02146 | PF02816 | PF03465 | PF04192 | PF05041 | PF05964 | PF07140 | PF08159 |
| PF00265 | PF00659 | PF01088 | PF01501 | PF02148 | PF02817 | PF03467 | PF04193 | PF05044 | PF05965 | PF07142 | PF08160 |

|         |         |         |         |         |         |         |         |         |         |         |         |
|---------|---------|---------|---------|---------|---------|---------|---------|---------|---------|---------|---------|
| PF00266 | PF00662 | PF01090 | PF01504 | PF02149 | PF02820 | PF03477 | PF04194 | PF05046 | PF05967 | PF07145 | PF08161 |
| PF00268 | PF00666 | PF01091 | PF01505 | PF02150 | PF02822 | PF03483 | PF04201 | PF05047 | PF05972 | PF07147 | PF08162 |
| PF00271 | PF00667 | PF01092 | PF01509 | PF02157 | PF02823 | PF03484 | PF04209 | PF05051 | PF05978 | PF07156 | PF08163 |
| PF00273 | PF00670 | PF01093 | PF01510 | PF02165 | PF02824 | PF03485 | PF04212 | PF05053 | PF05983 | PF07159 | PF08164 |
| PF00274 | PF00673 | PF01096 | PF01512 | PF02167 | PF02825 | PF03487 | PF04218 | PF05060 | PF05995 | PF07163 | PF08165 |
| PF00276 | PF00675 | PF01101 | PF01513 | PF02170 | PF02826 | PF03489 | PF04253 | PF05063 | PF05997 | PF07169 | PF08168 |
| PF00278 | PF00676 | PF01103 | PF01529 | PF02171 | PF02827 | PF03491 | PF04258 | PF05064 | PF06001 | PF07175 | PF08169 |
| PF00281 | PF00679 | PF01105 | PF01530 | PF02172 | PF02828 | PF03493 | PF04263 | PF05071 | PF06008 | PF07177 | PF08170 |
| PF00285 | PF00682 | PF01106 | PF01531 | PF02173 | PF02836 | PF03494 | PF04265 | PF05083 | PF06009 | PF07189 | PF08180 |
| PF00287 | PF00683 | PF01109 | PF01532 | PF02174 | PF02837 | PF03501 | PF04272 | PF05089 | PF06010 | PF07202 | PF08185 |
| PF00288 | PF00684 | PF01110 | PF01534 | PF02177 | PF02838 | PF03508 | PF04275 | PF05090 | PF06012 | PF07225 | PF08188 |
| PF00289 | PF00685 | PF01111 | PF01536 | PF02178 | PF02840 | PF03509 | PF04280 | PF05091 | PF06017 | PF07260 | PF08189 |
| PF00291 | PF00686 | PF01112 | PF01545 | PF02179 | PF02841 | PF03511 | PF04300 | PF05093 | PF06025 | PF07263 | PF08198 |
| PF00292 | PF00687 | PF01114 | PF01549 | PF02180 | PF02843 | PF03516 | PF04376 | PF05104 | PF06026 | PF07264 | PF08202 |
| PF00293 | PF00689 | PF01115 | PF01551 | PF02181 | PF02844 | PF03517 | PF04377 | PF05110 | PF06031 | PF07276 | PF08204 |
| PF00294 | PF00690 | PF01119 | PF01553 | PF02182 | PF02845 | PF03520 | PF04379 | PF05111 | PF06046 | PF07281 | PF08210 |
| PF00297 | PF00692 | PF01120 | PF01556 | PF02184 | PF02847 | PF03521 | PF04382 | PF05118 | PF06049 | PF07286 | PF08212 |
| PF00298 | PF00694 | PF01121 | PF01557 | PF02185 | PF02852 | PF03522 | PF04388 | PF05127 | PF06052 | PF07292 | PF08213 |
| PF00300 | PF00696 | PF01122 | PF01562 | PF02186 | PF02854 | PF03523 | PF04389 | PF05131 | PF06058 | PF07297 | PF08215 |
| PF00303 | PF00698 | PF01124 | PF01564 | PF02187 | PF02862 | PF03528 | PF04406 | PF05132 | PF06060 | PF07303 | PF08216 |
| PF00305 | PF00704 | PF01125 | PF01565 | PF02189 | PF02864 | PF03529 | PF04408 | PF05147 | PF06068 | PF07324 | PF08221 |
| PF00306 | PF00705 | PF01126 | PF01566 | PF02190 | PF02865 | PF03530 | PF04410 | PF05148 | PF06071 | PF07334 | PF08225 |
| PF00307 | PF00707 | PF01127 | PF01569 | PF02191 | PF02866 | PF03531 | PF04418 | PF05153 | PF06079 | PF07347 | PF08232 |
| PF00310 | PF00708 | PF01129 | PF01571 | PF02192 | PF02867 | PF03533 | PF04419 | PF05158 | PF06083 | PF07353 | PF08235 |
| PF00312 | PF00709 | PF01130 | PF01575 | PF02194 | PF02870 | PF03535 | PF04420 | PF05160 | PF06087 | PF07354 | PF08240 |
| PF00313 | PF00710 | PF01131 | PF01582 | PF02196 | PF02872 | PF03540 | PF04421 | PF05162 | PF06093 | PF07359 | PF08241 |
| PF00316 | PF00711 | PF01133 | PF01583 | PF02197 | PF02874 | PF03542 | PF04423 | PF05181 | PF06105 | PF07400 | PF08242 |
| PF00317 | PF00714 | PF01134 | PF01585 | PF02198 | PF02875 | PF03546 | PF04427 | PF05184 | PF06119 | PF07406 | PF08246 |
| PF00318 | PF00715 | PF01135 | PF01586 | PF02199 | PF02877 | PF03547 | PF04433 | PF05185 | PF06121 | PF07412 | PF08248 |
| PF00319 | PF00717 | PF01138 | PF01588 | PF02201 | PF02879 | PF03556 | PF04434 | PF05186 | PF06140 | PF07421 | PF08256 |
| PF00320 | PF00719 | PF01140 | PF01590 | PF02202 | PF02880 | PF03561 | PF04437 | PF05187 | PF06148 | PF07425 | PF08264 |
| PF00323 | PF00727 | PF01142 | PF01591 | PF02204 | PF02881 | PF03567 | PF04438 | PF05188 | PF06179 | PF07440 | PF08265 |

|         |         |         |         |         |         |         |         |         |         |         |         |
|---------|---------|---------|---------|---------|---------|---------|---------|---------|---------|---------|---------|
| PF00324 | PF00728 | PF01144 | PF01592 | PF02205 | PF02882 | PF03568 | PF04440 | PF05189 | PF06189 | PF07443 | PF08266 |
| PF00326 | PF00731 | PF01146 | PF01596 | PF02207 | PF02883 | PF03571 | PF04442 | PF05190 | PF06201 | PF07448 | PF08271 |
| PF00327 | PF00732 | PF01148 | PF01597 | PF02208 | PF02885 | PF03572 | PF04487 | PF05191 | PF06202 | PF07452 | PF08279 |
| PF00328 | PF00733 | PF01150 | PF01598 | PF02209 | PF02887 | PF03575 | PF04488 | PF05193 | PF06209 | PF07458 | PF08285 |
| PF00329 | PF00735 | PF01151 | PF01599 | PF02212 | PF02888 | PF03577 | PF04494 | PF05195 | PF06211 | PF07469 | PF08288 |
| PF00330 | PF00736 | PF01153 | PF01602 | PF02213 | PF02889 | PF03587 | PF04495 | PF05196 | PF06212 | PF07474 | PF08292 |
| PF00333 | PF00743 | PF01154 | PF01603 | PF02214 | PF02891 | PF03600 | PF04503 | PF05199 | PF06214 | PF07479 | PF08295 |
| PF00334 | PF00748 | PF01157 | PF01608 | PF02218 | PF02892 | PF03604 | PF04505 | PF05207 | PF06218 | PF07496 | PF08311 |
| PF00335 | PF00749 | PF01158 | PF01619 | PF02219 | PF02893 | PF03607 | PF04511 | PF05208 | PF06220 | PF07500 | PF08313 |
| PF00337 | PF00750 | PF01159 | PF01624 | PF02221 | PF02897 | PF03615 | PF04515 | PF05222 | PF06221 | PF07502 | PF08318 |
| PF00338 | PF00751 | PF01160 | PF01625 | PF02223 | PF02898 | PF03619 | PF04538 | PF05236 | PF06229 | PF07521 | PF08321 |
| PF00339 | PF00752 | PF01161 | PF01630 | PF02225 | PF02902 | PF03623 | PF04547 | PF05237 | PF06237 | PF07522 | PF08326 |

| <b>Metazoa +<br/>Fungi<br/>Pfam ID</b> |         |         |         |         |         |         |         |         |         |         |         |         |         |         |
|----------------------------------------|---------|---------|---------|---------|---------|---------|---------|---------|---------|---------|---------|---------|---------|---------|
| PF00005                                | PF00398 | PF00809 | PF01187 | PF01599 | PF02140 | PF02760 | PF03260 | PF03896 | PF04500 | PF05060 | PF05781 | PF06644 | PF07711 | PF08170 |
| PF00006                                | PF00399 | PF00810 | PF01191 | PF01602 | PF02141 | PF02761 | PF03261 | PF03900 | PF04502 | PF05063 | PF05782 | PF06645 | PF07716 | PF08171 |
| PF00010                                | PF00401 | PF00811 | PF01192 | PF01603 | PF02144 | PF02762 | PF03265 | PF03901 | PF04503 | PF05064 | PF05783 | PF06650 | PF07717 | PF08174 |
| PF00013                                | PF00402 | PF00812 | PF01194 | PF01608 | PF02146 | PF02765 | PF03266 | PF03902 | PF04505 | PF05071 | PF05786 | PF06652 | PF07718 | PF08180 |
| PF00014                                | PF00403 | PF00814 | PF01195 | PF01619 | PF02148 | PF02769 | PF03271 | PF03907 | PF04506 | PF05083 | PF05790 | PF06657 | PF07719 | PF08184 |
| PF00017                                | PF00410 | PF00815 | PF01196 | PF01625 | PF02149 | PF02770 | PF03285 | PF03908 | PF04511 | PF05089 | PF05793 | PF06658 | PF07720 | PF08185 |
| PF00019                                | PF00411 | PF00817 | PF01199 | PF01627 | PF02150 | PF02771 | PF03291 | PF03909 | PF04515 | PF05090 | PF05794 | PF06662 | PF07722 | PF08187 |
| PF00025                                | PF00412 | PF00819 | PF01200 | PF01630 | PF02152 | PF02772 | PF03297 | PF03911 | PF04516 | PF05091 | PF05804 | PF06663 | PF07723 | PF08188 |
| PF00026                                | PF00414 | PF00821 | PF01201 | PF01634 | PF02156 | PF02773 | PF03299 | PF03914 | PF04538 | PF05093 | PF05805 | PF06668 | PF07724 | PF08189 |
| PF00029                                | PF00416 | PF00822 | PF01202 | PF01642 | PF02157 | PF02774 | PF03301 | PF03915 | PF04547 | PF05104 | PF05808 | PF06677 | PF07731 | PF08192 |
| PF00030                                | PF00418 | PF00826 | PF01204 | PF01644 | PF02162 | PF02779 | PF03308 | PF03919 | PF04548 | PF05110 | PF05811 | PF06687 | PF07732 | PF08194 |
| PF00032                                | PF00420 | PF00827 | PF01205 | PF01645 | PF02165 | PF02780 | PF03311 | PF03921 | PF04549 | PF05111 | PF05817 | PF06699 | PF07735 | PF08198 |
| PF00034                                | PF00425 | PF00828 | PF01207 | PF01648 | PF02167 | PF02781 | PF03321 | PF03928 | PF04553 | PF05118 | PF05821 | PF06701 | PF07738 | PF08202 |
| PF00037                                | PF00428 | PF00829 | PF01208 | PF01652 | PF02170 | PF02784 | PF03332 | PF03931 | PF04557 | PF05127 | PF05822 | PF06702 | PF07740 | PF08203 |
| PF00039                                | PF00433 | PF00830 | PF01209 | PF01655 | PF02171 | PF02785 | PF03344 | PF03932 | PF04558 | PF05131 | PF05823 | PF06703 | PF07741 | PF08204 |
| PF00040                                | PF00436 | PF00831 | PF01210 | PF01658 | PF02172 | PF02789 | PF03345 | PF03935 | PF04560 | PF05132 | PF05824 | PF06726 | PF07742 | PF08206 |
| PF00044                                | PF00438 | PF00832 | PF01212 | PF01661 | PF02173 | PF02791 | PF03348 | PF03937 | PF04561 | PF05141 | PF05826 | PF06728 | PF07743 | PF08208 |
| PF00045                                | PF00439 | PF00833 | PF01213 | PF01663 | PF02174 | PF02792 | PF03351 | PF03939 | PF04565 | PF05147 | PF05827 | PF06729 | PF07744 | PF08210 |
| PF00048                                | PF00444 | PF00834 | PF01214 | PF01667 | PF02177 | PF02793 | PF03359 | PF03940 | PF04566 | PF05148 | PF05832 | PF06732 | PF07745 | PF08212 |
| PF00050                                | PF00445 | PF00835 | PF01215 | PF01669 | PF02178 | PF02795 | PF03360 | PF03941 | PF04567 | PF05151 | PF05835 | PF06733 | PF07748 | PF08213 |
| PF00051                                | PF00446 | PF00836 | PF01216 | PF01670 | PF02179 | PF02799 | PF03366 | PF03943 | PF04568 | PF05153 | PF05836 | PF06740 | PF07749 | PF08215 |
| PF00052                                | PF00447 | PF00837 | PF01217 | PF01679 | PF02180 | PF02800 | PF03367 | PF03946 | PF04571 | PF05154 | PF05839 | PF06741 | PF07763 | PF08216 |
| PF00054                                | PF00448 | PF00839 | PF01218 | PF01680 | PF02181 | PF02803 | PF03368 | PF03947 | PF04572 | PF05156 | PF05841 | PF06743 | PF07766 | PF08217 |
| PF00055                                | PF00449 | PF00840 | PF01220 | PF01681 | PF02182 | PF02804 | PF03370 | PF03949 | PF04573 | PF05158 | PF05843 | PF06752 | PF07767 | PF08221 |
| PF00056                                | PF00450 | PF00842 | PF01221 | PF01683 | PF02184 | PF02806 | PF03371 | PF03950 | PF04574 | PF05160 | PF05849 | PF06753 | PF07770 | PF08225 |
| PF00058                                | PF00451 | PF00849 | PF01223 | PF01687 | PF02185 | PF02807 | PF03372 | PF03952 | PF04579 | PF05161 | PF05856 | PF06756 | PF07774 | PF08226 |
| PF00060                                | PF00452 | PF00850 | PF01226 | PF01694 | PF02186 | PF02809 | PF03378 | PF03954 | PF04587 | PF05162 | PF05859 | PF06757 | PF07776 | PF08227 |
| PF00062                                | PF00454 | PF00852 | PF01227 | PF01697 | PF02187 | PF02811 | PF03381 | PF03957 | PF04588 | PF05172 | PF05863 | PF06766 | PF07778 | PF08228 |
| PF00066                                | PF00457 | PF00853 | PF01229 | PF01699 | PF02189 | PF02812 | PF03388 | PF03959 | PF04589 | PF05176 | PF05871 | PF06773 | PF07780 | PF08229 |

|         |         |         |         |         |         |         |         |         |         |         |         |         |         |         |
|---------|---------|---------|---------|---------|---------|---------|---------|---------|---------|---------|---------|---------|---------|---------|
| PF00068 | PF00458 | PF00855 | PF01230 | PF01702 | PF02190 | PF02815 | PF03392 | PF03964 | PF04590 | PF05178 | PF05875 | PF06775 | PF07782 | PF08232 |
| PF00072 | PF00459 | PF00856 | PF01231 | PF01704 | PF02191 | PF02816 | PF03398 | PF03966 | PF04592 | PF05180 | PF05879 | PF06777 | PF07798 | PF08234 |
| PF00074 | PF00462 | PF00857 | PF01232 | PF01705 | PF02192 | PF02817 | PF03399 | PF03969 | PF04593 | PF05181 | PF05881 | PF06783 | PF07807 | PF08235 |
| PF00075 | PF00463 | PF00860 | PF01233 | PF01709 | PF02194 | PF02819 | PF03402 | PF03972 | PF04597 | PF05182 | PF05889 | PF06784 | PF07808 | PF08236 |
| PF00077 | PF00464 | PF00861 | PF01234 | PF01712 | PF02195 | PF02820 | PF03403 | PF03973 | PF04598 | PF05183 | PF05890 | PF06807 | PF07810 | PF08240 |
| PF00080 | PF00465 | PF00864 | PF01237 | PF01713 | PF02196 | PF02822 | PF03404 | PF03980 | PF04603 | PF05184 | PF05891 | PF06814 | PF07815 | PF08242 |
| PF00081 | PF00466 | PF00865 | PF01238 | PF01715 | PF02198 | PF02823 | PF03414 | PF03981 | PF04611 | PF05185 | PF05902 | PF06816 | PF07817 | PF08243 |
| PF00085 | PF00467 | PF00867 | PF01239 | PF01717 | PF02199 | PF02824 | PF03416 | PF03982 | PF04614 | PF05186 | PF05903 | PF06817 | PF07818 | PF08244 |
| PF00087 | PF00468 | PF00868 | PF01242 | PF01722 | PF02200 | PF02825 | PF03417 | PF03983 | PF04615 | PF05187 | PF05912 | PF06818 | PF07819 | PF08245 |
| PF00088 | PF00472 | PF00870 | PF01243 | PF01723 | PF02201 | PF02826 | PF03422 | PF03985 | PF04617 | PF05188 | PF05916 | PF06821 | PF07822 | PF08246 |
| PF00090 | PF00473 | PF00875 | PF01244 | PF01725 | PF02202 | PF02827 | PF03437 | PF03986 | PF04621 | PF05189 | PF05918 | PF06824 | PF07829 | PF08248 |
| PF00091 | PF00474 | PF00876 | PF01245 | PF01728 | PF02204 | PF02828 | PF03439 | PF03987 | PF04622 | PF05190 | PF05922 | PF06825 | PF07830 | PF08249 |
| PF00093 | PF00475 | PF00879 | PF01246 | PF01729 | PF02205 | PF02833 | PF03441 | PF03990 | PF04625 | PF05191 | PF05923 | PF06827 | PF07831 | PF08250 |
| PF00095 | PF00476 | PF00881 | PF01247 | PF01731 | PF02206 | PF02836 | PF03443 | PF03991 | PF04626 | PF05195 | PF05924 | PF06828 | PF07834 | PF08251 |
| PF00096 | PF00479 | PF00884 | PF01248 | PF01733 | PF02207 | PF02840 | PF03446 | PF03992 | PF04627 | PF05196 | PF05933 | PF06831 | PF07837 | PF08252 |
| PF00098 | PF00480 | PF00885 | PF01249 | PF01734 | PF02208 | PF02841 | PF03447 | PF03997 | PF04628 | PF05199 | PF05937 | PF06839 | PF07842 | PF08256 |
| PF00107 | PF00481 | PF00886 | PF01251 | PF01740 | PF02209 | PF02843 | PF03450 | PF03998 | PF04629 | PF05202 | PF05956 | PF06858 | PF07847 | PF08257 |
| PF00108 | PF00484 | PF00887 | PF01253 | PF01743 | PF02212 | PF02844 | PF03451 | PF03999 | PF04636 | PF05204 | PF05958 | PF06862 | PF07850 | PF08258 |
| PF00112 | PF00485 | PF00889 | PF01254 | PF01746 | PF02213 | PF02845 | PF03452 | PF04001 | PF04641 | PF05205 | PF05964 | PF06870 | PF07851 | PF08259 |
| PF00113 | PF00487 | PF00890 | PF01255 | PF01747 | PF02218 | PF02847 | PF03453 | PF04003 | PF04643 | PF05207 | PF05965 | PF06875 | PF07856 | PF08260 |
| PF00116 | PF00488 | PF00891 | PF01256 | PF01748 | PF02219 | PF02852 | PF03454 | PF04004 | PF04648 | PF05208 | PF05967 | PF06881 | PF07857 | PF08261 |
| PF00117 | PF00489 | PF00892 | PF01257 | PF01749 | PF02221 | PF02861 | PF03455 | PF04005 | PF04652 | PF05216 | PF05971 | PF06886 | PF07859 | PF08262 |
| PF00121 | PF00490 | PF00895 | PF01259 | PF01751 | PF02222 | PF02862 | PF03456 | PF04006 | PF04658 | PF05222 | PF05972 | PF06888 | PF07883 | PF08265 |
| PF00123 | PF00491 | PF00896 | PF01261 | PF01753 | PF02223 | PF02864 | PF03460 | PF04030 | PF04664 | PF05224 | PF05978 | PF06905 | PF07884 | PF08266 |
| PF00129 | PF00493 | PF00899 | PF01263 | PF01754 | PF02225 | PF02865 | PF03462 | PF04031 | PF04667 | PF05225 | PF05980 | PF06907 | PF07885 | PF08267 |
| PF00130 | PF00494 | PF00900 | PF01264 | PF01756 | PF02229 | PF02866 | PF03463 | PF04032 | PF04668 | PF05234 | PF05995 | PF06910 | PF07894 | PF08271 |
| PF00131 | PF00498 | PF00903 | PF01265 | PF01757 | PF02230 | PF02867 | PF03464 | PF04034 | PF04670 | PF05236 | PF05997 | PF06916 | PF07896 | PF08279 |
| PF00132 | PF00499 | PF00904 | PF01267 | PF01758 | PF02233 | PF02870 | PF03465 | PF04037 | PF04675 | PF05237 | PF06001 | PF06920 | PF07904 | PF08285 |
| PF00136 | PF00507 | PF00909 | PF01268 | PF01759 | PF02234 | PF02872 | PF03467 | PF04042 | PF04676 | PF05238 | PF06008 | PF06936 | PF07912 | PF08286 |
| PF00137 | PF00510 | PF00916 | PF01269 | PF01761 | PF02237 | PF02874 | PF03477 | PF04044 | PF04677 | PF05240 | PF06009 | PF06937 | PF07915 | PF08287 |
| PF00141 | PF00512 | PF00917 | PF01271 | PF01762 | PF02238 | PF02875 | PF03481 | PF04045 | PF04679 | PF05241 | PF06010 | PF06941 | PF07923 | PF08288 |
| PF00144 | PF00521 | PF00919 | PF01273 | PF01765 | PF02244 | PF02877 | PF03483 | PF04046 | PF04680 | PF05242 | PF06011 | PF06951 | PF07926 | PF08292 |



|         |         |         |         |         |         |         |         |         |         |         |         |         |         |         |
|---------|---------|---------|---------|---------|---------|---------|---------|---------|---------|---------|---------|---------|---------|---------|
| PF00145 | PF00525 | PF00920 | PF01274 | PF01770 | PF02245 | PF02879 | PF03484 | PF04047 | PF04683 | PF05250 | PF06012 | PF06954 | PF07928 | PF08293 |
| PF00146 | PF00531 | PF00923 | PF01275 | PF01773 | PF02251 | PF02880 | PF03485 | PF04048 | PF04691 | PF05251 | PF06017 | PF06957 | PF07933 | PF08295 |
| PF00152 | PF00538 | PF00925 | PF01279 | PF01775 | PF02252 | PF02881 | PF03487 | PF04049 | PF04692 | PF05253 | PF06020 | PF06959 | PF07934 | PF08296 |
| PF00153 | PF00542 | PF00926 | PF01280 | PF01776 | PF02257 | PF02882 | PF03489 | PF04050 | PF04695 | PF05254 | PF06025 | PF06963 | PF07936 | PF08297 |
| PF00157 | PF00544 | PF00928 | PF01281 | PF01777 | PF02259 | PF02883 | PF03491 | PF04051 | PF04696 | PF05255 | PF06026 | PF06964 | PF07938 | PF08302 |
| PF00159 | PF00545 | PF00929 | PF01282 | PF01778 | PF02260 | PF02885 | PF03493 | PF04053 | PF04697 | PF05270 | PF06031 | PF06968 | PF07941 | PF08303 |
| PF00160 | PF00547 | PF00930 | PF01283 | PF01779 | PF02262 | PF02887 | PF03494 | PF04054 | PF04698 | PF05276 | PF06046 | PF06970 | PF07942 | PF08304 |
| PF00162 | PF00549 | PF00931 | PF01284 | PF01780 | PF02265 | PF02888 | PF03501 | PF04055 | PF04699 | PF05277 | PF06049 | PF06978 | PF07945 | PF08311 |
| PF00163 | PF00551 | PF00932 | PF01285 | PF01781 | PF02267 | PF02889 | PF03508 | PF04056 | PF04704 | PF05279 | PF06052 | PF06984 | PF07946 | PF08312 |
| PF00166 | PF00552 | PF00933 | PF01286 | PF01783 | PF02268 | PF02891 | PF03509 | PF04057 | PF04706 | PF05281 | PF06058 | PF06985 | PF07954 | PF08313 |
| PF00171 | PF00554 | PF00935 | PF01287 | PF01784 | PF02269 | PF02892 | PF03511 | PF04059 | PF04707 | PF05282 | PF06060 | PF06990 | PF07955 | PF08315 |
| PF00172 | PF00560 | PF00940 | PF01288 | PF01786 | PF02270 | PF02894 | PF03516 | PF04061 | PF04709 | PF05283 | PF06068 | PF06991 | PF07956 | PF08316 |
| PF00173 | PF00562 | PF00941 | PF01290 | PF01791 | PF02271 | PF02897 | PF03517 | PF04062 | PF04710 | PF05285 | PF06071 | PF06994 | PF07957 | PF08317 |
| PF00174 | PF00564 | PF00953 | PF01291 | PF01793 | PF02272 | PF02898 | PF03520 | PF04063 | PF04711 | PF05287 | PF06079 | PF07001 | PF07958 | PF08318 |
| PF00177 | PF00566 | PF00956 | PF01293 | PF01794 | PF02274 | PF02902 | PF03521 | PF04064 | PF04714 | PF05291 | PF06083 | PF07002 | PF07959 | PF08319 |
| PF00178 | PF00568 | PF00958 | PF01300 | PF01798 | PF02275 | PF02906 | PF03522 | PF04065 | PF04715 | PF05292 | PF06087 | PF07010 | PF07960 | PF08320 |
| PF00179 | PF00569 | PF00961 | PF01302 | PF01799 | PF02284 | PF02910 | PF03523 | PF04068 | PF04716 | PF05296 | PF06093 | PF07019 | PF07961 | PF08321 |
| PF00180 | PF00570 | PF00962 | PF01303 | PF01803 | PF02285 | PF02911 | PF03525 | PF04072 | PF04718 | PF05298 | PF06105 | PF07034 | PF07962 | PF08322 |
| PF00181 | PF00572 | PF00969 | PF01305 | PF01805 | PF02290 | PF02913 | PF03528 | PF04078 | PF04719 | PF05300 | PF06119 | PF07035 | PF07964 | PF08325 |
| PF00184 | PF00573 | PF00975 | PF01315 | PF01808 | PF02291 | PF02919 | PF03529 | PF04080 | PF04722 | PF05303 | PF06121 | PF07054 | PF07965 | PF08326 |
| PF00185 | PF00574 | PF00977 | PF01323 | PF01812 | PF02292 | PF02920 | PF03530 | PF04081 | PF04724 | PF05316 | PF06127 | PF07061 | PF07966 | PF08327 |
| PF00186 | PF00575 | PF00984 | PF01327 | PF01813 | PF02296 | PF02921 | PF03531 | PF04083 | PF04727 | PF05324 | PF06140 | PF07062 | PF07967 | PF08332 |
| PF00187 | PF00576 | PF00988 | PF01328 | PF01814 | PF02297 | PF02922 | PF03533 | PF04084 | PF04729 | PF05326 | PF06148 | PF07064 | PF07970 | PF08333 |
| PF00188 | PF00578 | PF00993 | PF01329 | PF01817 | PF02301 | PF02928 | PF03535 | PF04086 | PF04731 | PF05327 | PF06151 | PF07074 | PF07973 | PF08336 |
| PF00189 | PF00579 | PF00994 | PF01331 | PF01822 | PF02310 | PF02929 | PF03540 | PF04088 | PF04732 | PF05328 | PF06172 | PF07081 | PF07974 | PF08337 |
| PF00191 | PF00580 | PF00996 | PF01335 | PF01823 | PF02312 | PF02933 | PF03542 | PF04089 | PF04733 | PF05337 | PF06179 | PF07084 | PF07975 | PF08344 |
| PF00193 | PF00581 | PF00999 | PF01336 | PF01827 | PF02318 | PF02934 | PF03547 | PF04090 | PF04736 | PF05345 | PF06189 | PF07093 | PF07976 | PF08351 |
| PF00198 | PF00582 | PF01000 | PF01341 | PF01828 | PF02319 | PF02935 | PF03556 | PF04091 | PF04739 | PF05346 | PF06201 | PF07106 | PF07978 | PF08354 |
| PF00199 | PF00584 | PF01007 | PF01342 | PF01833 | PF02320 | PF02937 | PF03561 | PF04095 | PF04749 | PF05347 | PF06202 | PF07111 | PF07985 | PF08355 |
| PF00202 | PF00585 | PF01008 | PF01347 | PF01835 | PF02330 | PF02939 | PF03567 | PF04096 | PF04750 | PF05348 | PF06209 | PF07140 | PF07986 | PF08356 |
| PF00203 | PF00587 | PF01011 | PF01348 | PF01839 | PF02337 | PF02940 | PF03568 | PF04097 | PF04752 | PF05349 | PF06211 | PF07142 | PF07988 | PF08357 |
| PF00204 | PF00588 | PF01012 | PF01351 | PF01840 | PF02338 | PF02944 | PF03571 | PF04098 | PF04756 | PF05350 | PF06212 | PF07145 | PF07989 | PF08365 |

|         |         |         |         |         |         |         |         |         |         |         |         |         |         |         |
|---------|---------|---------|---------|---------|---------|---------|---------|---------|---------|---------|---------|---------|---------|---------|
| PF00206 | PF00590 | PF01014 | PF01353 | PF01841 | PF02344 | PF02946 | PF03572 | PF04099 | PF04757 | PF05351 | PF06214 | PF07147 | PF07991 | PF08366 |
| PF00207 | PF00591 | PF01015 | PF01354 | PF01842 | PF02345 | PF02947 | PF03575 | PF04100 | PF04758 | PF05353 | PF06218 | PF07149 | PF07993 | PF08367 |
| PF00208 | PF00594 | PF01016 | PF01363 | PF01843 | PF02347 | PF02948 | PF03577 | PF04101 | PF04760 | PF05355 | PF06220 | PF07156 | PF07994 | PF08368 |
| PF00209 | PF00596 | PF01017 | PF01365 | PF01844 | PF02348 | PF02949 | PF03583 | PF04103 | PF04762 | PF05362 | PF06221 | PF07159 | PF08005 | PF08373 |
| PF00210 | PF00605 | PF01018 | PF01368 | PF01846 | PF02350 | PF02961 | PF03587 | PF04104 | PF04768 | PF05365 | PF06229 | PF07163 | PF08015 | PF08374 |
| PF00211 | PF00609 | PF01020 | PF01369 | PF01847 | PF02351 | PF02965 | PF03595 | PF04106 | PF04774 | PF05366 | PF06237 | PF07165 | PF08016 | PF08375 |
| PF00213 | PF00610 | PF01021 | PF01372 | PF01852 | PF02354 | PF02966 | PF03600 | PF04109 | PF04775 | PF05374 | PF06248 | PF07169 | PF08022 | PF08377 |
| PF00214 | PF00612 | PF01023 | PF01379 | PF01853 | PF02358 | PF02969 | PF03604 | PF04110 | PF04777 | PF05378 | PF06268 | PF07175 | PF08023 | PF08383 |
| PF00215 | PF00613 | PF01025 | PF01380 | PF01857 | PF02359 | PF02970 | PF03615 | PF04111 | PF04790 | PF05383 | PF06292 | PF07177 | PF08024 | PF08384 |
| PF00218 | PF00614 | PF01026 | PF01382 | PF01858 | PF02364 | PF02971 | PF03619 | PF04112 | PF04791 | PF05386 | PF06294 | PF07200 | PF08025 | PF08385 |
| PF00219 | PF00616 | PF01027 | PF01384 | PF01866 | PF02366 | PF02973 | PF03623 | PF04113 | PF04795 | PF05387 | PF06297 | PF07202 | PF08026 | PF08389 |
| PF00220 | PF00617 | PF01028 | PF01387 | PF01868 | PF02372 | PF02978 | PF03630 | PF04114 | PF04799 | PF05388 | PF06309 | PF07225 | PF08029 | PF08390 |
| PF00221 | PF00618 | PF01033 | PF01388 | PF01869 | PF02374 | PF02982 | PF03632 | PF04115 | PF04800 | PF05390 | PF06311 | PF07228 | PF08030 | PF08393 |
| PF00224 | PF00621 | PF01035 | PF01390 | PF01872 | PF02376 | PF02985 | PF03633 | PF04116 | PF04801 | PF05391 | PF06312 | PF07247 | PF08032 | PF08397 |
| PF00225 | PF00623 | PF01036 | PF01392 | PF01873 | PF02377 | PF02987 | PF03635 | PF04117 | PF04802 | PF05392 | PF06313 | PF07249 | PF08033 | PF08399 |
| PF00230 | PF00624 | PF01039 | PF01393 | PF01875 | PF02383 | PF02990 | PF03636 | PF04118 | PF04803 | PF05395 | PF06314 | PF07253 | PF08034 | PF08403 |
| PF00231 | PF00627 | PF01040 | PF01394 | PF01876 | PF02386 | PF02991 | PF03637 | PF04119 | PF04810 | PF05397 | PF06320 | PF07260 | PF08035 | PF08407 |
| PF00232 | PF00629 | PF01042 | PF01395 | PF01883 | PF02390 | PF02994 | PF03639 | PF04120 | PF04811 | PF05399 | PF06324 | PF07263 | PF08036 | PF08412 |
| PF00235 | PF00632 | PF01048 | PF01396 | PF01885 | PF02391 | PF02996 | PF03641 | PF04121 | PF04812 | PF05404 | PF06328 | PF07264 | PF08037 | PF08416 |
| PF00236 | PF00635 | PF01055 | PF01397 | PF01894 | PF02403 | PF03002 | PF03643 | PF04124 | PF04813 | PF05405 | PF06330 | PF07276 | PF08038 | PF08418 |
| PF00237 | PF00636 | PF01058 | PF01398 | PF01896 | PF02404 | PF03006 | PF03645 | PF04127 | PF04814 | PF05406 | PF06331 | PF07281 | PF08039 | PF08420 |
| PF00238 | PF00638 | PF01059 | PF01401 | PF01900 | PF02410 | PF03016 | PF03647 | PF04128 | PF04815 | PF05418 | PF06333 | PF07286 | PF08040 | PF08424 |
| PF00241 | PF00639 | PF01060 | PF01403 | PF01907 | PF02412 | PF03020 | PF03648 | PF04129 | PF04818 | PF05427 | PF06337 | PF07292 | PF08045 | PF08426 |
| PF00243 | PF00642 | PF01061 | PF01404 | PF01910 | PF02422 | PF03024 | PF03651 | PF04130 | PF04819 | PF05428 | PF06342 | PF07294 | PF08058 | PF08429 |
| PF00244 | PF00643 | PF01063 | PF01410 | PF01912 | PF02423 | PF03027 | PF03657 | PF04132 | PF04821 | PF05433 | PF06345 | PF07303 | PF08059 | PF08430 |
| PF00245 | PF00644 | PF01064 | PF01411 | PF01915 | PF02425 | PF03029 | PF03659 | PF04133 | PF04822 | PF05434 | PF06350 | PF07324 | PF08060 | PF08432 |
| PF00246 | PF00645 | PF01066 | PF01412 | PF01916 | PF02434 | PF03031 | PF03660 | PF04135 | PF04824 | PF05436 | PF06357 | PF07327 | PF08061 | PF08434 |
| PF00248 | PF00646 | PF01067 | PF01413 | PF01918 | PF02436 | PF03032 | PF03661 | PF04136 | PF04825 | PF05438 | PF06365 | PF07334 | PF08062 | PF08438 |
| PF00250 | PF00647 | PF01068 | PF01414 | PF01922 | PF02437 | PF03033 | PF03663 | PF04137 | PF04831 | PF05439 | PF06367 | PF07347 | PF08063 | PF08441 |
| PF00251 | PF00649 | PF01070 | PF01415 | PF01923 | PF02441 | PF03034 | PF03664 | PF04139 | PF04836 | PF05450 | PF06369 | PF07353 | PF08064 | PF08442 |
| PF00252 | PF00653 | PF01071 | PF01416 | PF01926 | PF02450 | PF03036 | PF03665 | PF04140 | PF04840 | PF05453 | PF06372 | PF07354 | PF08065 | PF08448 |
| PF00253 | PF00654 | PF01073 | PF01417 | PF01928 | PF02453 | PF03039 | PF03666 | PF04144 | PF04841 | PF05454 | PF06373 | PF07359 | PF08066 | PF08449 |

|         |         |         |         |         |         |         |         |         |         |         |         |         |         |         |
|---------|---------|---------|---------|---------|---------|---------|---------|---------|---------|---------|---------|---------|---------|---------|
| PF00255 | PF00656 | PF01074 | PF01419 | PF01929 | PF02460 | PF03045 | PF03669 | PF04145 | PF04845 | PF05456 | PF06374 | PF07365 | PF08067 | PF08451 |
| PF00256 | PF00657 | PF01077 | PF01421 | PF01933 | PF02466 | PF03051 | PF03670 | PF04146 | PF04847 | PF05458 | PF06375 | PF07366 | PF08068 | PF08454 |
| PF00258 | PF00658 | PF01079 | PF01422 | PF01937 | PF02469 | PF03055 | PF03671 | PF04147 | PF04855 | PF05460 | PF06384 | PF07367 | PF08069 | PF08466 |
| PF00260 | PF00659 | PF01080 | PF01424 | PF01938 | PF02485 | PF03056 | PF03674 | PF04148 | PF04856 | PF05461 | PF06387 | PF07393 | PF08070 | PF08473 |
| PF00262 | PF00662 | PF01082 | PF01425 | PF01946 | PF02487 | PF03061 | PF03676 | PF04152 | PF04858 | PF05463 | PF06391 | PF07400 | PF08071 | PF08474 |
| PF00265 | PF00666 | PF01083 | PF01426 | PF01958 | PF02492 | PF03062 | PF03690 | PF04153 | PF04868 | PF05466 | PF06393 | PF07406 | PF08072 | PF08477 |
| PF00268 | PF00670 | PF01084 | PF01428 | PF01960 | PF02493 | PF03068 | PF03694 | PF04157 | PF04869 | PF05469 | PF06394 | PF07412 | PF08073 | PF08487 |
| PF00272 | PF00673 | PF01085 | PF01432 | PF01963 | PF02494 | PF03070 | PF03700 | PF04158 | PF04871 | PF05470 | PF06395 | PF07421 | PF08074 | PF08490 |
| PF00273 | PF00676 | PF01086 | PF01434 | PF01965 | PF02513 | PF03073 | PF03712 | PF04163 | PF04874 | PF05476 | PF06396 | PF07425 | PF08075 | PF08491 |
| PF00274 | PF00677 | PF01087 | PF01435 | PF01966 | PF02515 | PF03074 | PF03715 | PF04176 | PF04882 | PF05477 | PF06398 | PF07440 | PF08079 | PF08492 |
| PF00275 | PF00679 | PF01088 | PF01436 | PF01967 | PF02516 | PF03081 | PF03718 | PF04177 | PF04889 | PF05478 | PF06399 | PF07442 | PF08080 | PF08493 |
| PF00278 | PF00683 | PF01090 | PF01437 | PF01968 | PF02517 | PF03082 | PF03719 | PF04178 | PF04892 | PF05482 | PF06400 | PF07443 | PF08081 | PF08498 |
| PF00280 | PF00684 | PF01091 | PF01439 | PF01974 | PF02520 | PF03088 | PF03720 | PF04179 | PF04893 | PF05483 | PF06401 | PF07448 | PF08082 | PF08499 |
| PF00281 | PF00685 | PF01093 | PF01448 | PF01975 | PF02525 | PF03089 | PF03721 | PF04180 | PF04898 | PF05485 | PF06403 | PF07452 | PF08083 | PF08501 |
| PF00285 | PF00686 | PF01095 | PF01450 | PF01981 | PF02535 | PF03091 | PF03722 | PF04181 | PF04900 | PF05486 | PF06417 | PF07458 | PF08084 | PF08502 |
| PF00287 | PF00687 | PF01096 | PF01451 | PF01984 | PF02536 | PF03095 | PF03723 | PF04182 | PF04901 | PF05492 | PF06418 | PF07464 | PF08086 | PF08504 |
| PF00288 | PF00689 | PF01101 | PF01459 | PF01988 | PF02538 | PF03096 | PF03725 | PF04185 | PF04902 | PF05493 | PF06419 | PF07469 | PF08088 | PF08506 |
| PF00290 | PF00690 | PF01103 | PF01462 | PF01991 | PF02541 | PF03097 | PF03726 | PF04188 | PF04904 | PF05495 | PF06420 | PF07473 | PF08089 | PF08508 |
| PF00291 | PF00692 | PF01105 | PF01463 | PF01992 | PF02544 | PF03099 | PF03727 | PF04189 | PF04905 | PF05499 | PF06421 | PF07474 | PF08091 | PF08509 |
| PF00292 | PF00694 | PF01106 | PF01464 | PF01997 | PF02545 | PF03102 | PF03730 | PF04191 | PF04908 | PF05502 | PF06423 | PF07477 | PF08092 | PF08510 |
| PF00293 | PF00696 | PF01109 | PF01465 | PF02005 | PF02548 | PF03104 | PF03731 | PF04192 | PF04909 | PF05507 | PF06424 | PF07479 | PF08093 | PF08513 |
| PF00297 | PF00699 | PF01110 | PF01466 | PF02008 | PF02550 | PF03105 | PF03733 | PF04193 | PF04910 | PF05508 | PF06425 | PF07488 | PF08094 | PF08514 |
| PF00298 | PF00706 | PF01111 | PF01467 | PF02012 | PF02551 | PF03109 | PF03735 | PF04194 | PF04911 | PF05510 | PF06427 | PF07491 | PF08095 | PF08515 |
| PF00300 | PF00707 | PF01112 | PF01469 | PF02013 | PF02567 | PF03124 | PF03736 | PF04201 | PF04912 | PF05517 | PF06428 | PF07492 | PF08096 | PF08516 |
| PF00303 | PF00708 | PF01114 | PF01470 | PF02014 | PF02569 | PF03126 | PF03737 | PF04209 | PF04921 | PF05522 | PF06432 | PF07493 | PF08097 | PF08517 |
| PF00304 | PF00709 | PF01115 | PF01472 | PF02015 | PF02578 | PF03127 | PF03746 | PF04212 | PF04923 | PF05529 | PF06441 | PF07496 | PF08098 | PF08518 |
| PF00305 | PF00710 | PF01116 | PF01474 | PF02017 | PF02580 | PF03128 | PF03747 | PF04218 | PF04925 | PF05546 | PF06446 | PF07500 | PF08099 | PF08519 |
| PF00306 | PF00711 | PF01118 | PF01477 | PF02019 | PF02581 | PF03129 | PF03758 | PF04230 | PF04926 | PF05571 | PF06448 | PF07502 | PF08101 | PF08520 |
| PF00307 | PF00713 | PF01119 | PF01479 | PF02020 | PF02582 | PF03130 | PF03762 | PF04253 | PF04930 | PF05572 | PF06451 | PF07519 | PF08102 | PF08523 |
| PF00313 | PF00714 | PF01120 | PF01480 | PF02022 | PF02585 | PF03131 | PF03765 | PF04258 | PF04934 | PF05577 | PF06456 | PF07521 | PF08103 | PF08526 |
| PF00317 | PF00715 | PF01121 | PF01482 | PF02025 | PF02586 | PF03133 | PF03768 | PF04272 | PF04935 | PF05586 | PF06457 | PF07522 | PF08104 | PF08527 |
| PF00318 | PF00717 | PF01122 | PF01483 | PF02026 | PF02594 | PF03134 | PF03769 | PF04275 | PF04938 | PF05587 | PF06459 | PF07524 | PF08105 | PF08528 |

|         |         |         |         |         |         |         |         |         |         |         |         |         |         |         |
|---------|---------|---------|---------|---------|---------|---------|---------|---------|---------|---------|---------|---------|---------|---------|
| PF00319 | PF00719 | PF01124 | PF01484 | PF02035 | PF02597 | PF03145 | PF03770 | PF04280 | PF04939 | PF05600 | PF06461 | PF07525 | PF08106 | PF08534 |
| PF00320 | PF00723 | PF01125 | PF01485 | PF02036 | PF02598 | PF03146 | PF03778 | PF04281 | PF04950 | PF05604 | PF06462 | PF07527 | PF08108 | PF08537 |
| PF00323 | PF00724 | PF01126 | PF01487 | PF02037 | PF02602 | PF03147 | PF03781 | PF04299 | PF04952 | PF05609 | PF06463 | PF07528 | PF08110 | PF08540 |
| PF00324 | PF00727 | PF01127 | PF01491 | PF02039 | PF02607 | PF03148 | PF03782 | PF04300 | PF04959 | PF05622 | PF06464 | PF07529 | PF08111 | PF08542 |
| PF00327 | PF00728 | PF01129 | PF01493 | PF02044 | PF02617 | PF03149 | PF03792 | PF04318 | PF04960 | PF05637 | PF06465 | PF07530 | PF08114 | PF08544 |
| PF00328 | PF00731 | PF01130 | PF01496 | PF02045 | PF02626 | PF03151 | PF03798 | PF04324 | PF04961 | PF05640 | PF06466 | PF07531 | PF08115 | PF08546 |
| PF00329 | PF00733 | PF01131 | PF01498 | PF02046 | PF02627 | PF03152 | PF03800 | PF04325 | PF04968 | PF05641 | PF06467 | PF07533 | PF08116 |         |
| PF00330 | PF00734 | PF01133 | PF01502 | PF02058 | PF02628 | PF03153 | PF03801 | PF04366 | PF04969 | PF05645 | PF06468 | PF07535 | PF08117 |         |
| PF00331 | PF00735 | PF01134 | PF01503 | PF02059 | PF02629 | PF03155 | PF03803 | PF04370 | PF04970 | PF05648 | PF06469 | PF07539 | PF08119 |         |
| PF00333 | PF00736 | PF01135 | PF01504 | PF02064 | PF02630 | PF03159 | PF03807 | PF04376 | PF04979 | PF05649 | PF06470 | PF07540 | PF08120 |         |
| PF00334 | PF00742 | PF01139 | PF01505 | PF02066 | PF02636 | PF03160 | PF03810 | PF04377 | PF04981 | PF05653 | PF06472 | PF07541 | PF08121 |         |
| PF00335 | PF00743 | PF01140 | PF01507 | PF02067 | PF02637 | PF03161 | PF03813 | PF04379 | PF04983 | PF05669 | PF06479 | PF07542 | PF08122 |         |
| PF00338 | PF00748 | PF01142 | PF01509 | PF02071 | PF02656 | PF03164 | PF03815 | PF04382 | PF04987 | PF05670 | PF06480 | PF07543 | PF08123 |         |
| PF00342 | PF00749 | PF01144 | PF01512 | PF02076 | PF02666 | PF03165 | PF03820 | PF04387 | PF04988 | PF05671 | PF06482 | PF07545 | PF08125 |         |
| PF00343 | PF00751 | PF01146 | PF01513 | PF02077 | PF02671 | PF03166 | PF03821 | PF04388 | PF04990 | PF05676 | PF06487 | PF07546 | PF08127 |         |
| PF00344 | PF00752 | PF01148 | PF01521 | PF02078 | PF02676 | PF03167 | PF03823 | PF04406 | PF04992 | PF05679 | PF06495 | PF07557 | PF08131 |         |
| PF00346 | PF00755 | PF01150 | PF01522 | PF02079 | PF02678 | PF03169 | PF03824 | PF04408 | PF05000 | PF05680 | PF06512 | PF07558 | PF08138 |         |
| PF00347 | PF00756 | PF01151 | PF01529 | PF02083 | PF02682 | PF03171 | PF03826 | PF04410 | PF05001 | PF05682 | PF06519 | PF07562 | PF08140 |         |
| PF00348 | PF00758 | PF01153 | PF01530 | PF02084 | PF02688 | PF03172 | PF03827 | PF04418 | PF05002 | PF05693 | PF06524 | PF07565 | PF08142 |         |
| PF00350 | PF00762 | PF01154 | PF01531 | PF02087 | PF02696 | PF03177 | PF03828 | PF04419 | PF05004 | PF05700 | PF06534 | PF07569 | PF08143 |         |
| PF00351 | PF00763 | PF01156 | PF01532 | PF02088 | PF02705 | PF03178 | PF03832 | PF04420 | PF05005 | PF05706 | PF06535 | PF07571 | PF08144 |         |
| PF00352 | PF00764 | PF01157 | PF01534 | PF02089 | PF02709 | PF03179 | PF03834 | PF04421 | PF05007 | PF05712 | PF06540 | PF07572 | PF08145 |         |
| PF00354 | PF00766 | PF01158 | PF01536 | PF02093 | PF02714 | PF03184 | PF03835 | PF04423 | PF05010 | PF05715 | PF06544 | PF07573 | PF08146 |         |
| PF00355 | PF00769 | PF01159 | PF01541 | PF02096 | PF02724 | PF03185 | PF03836 | PF04424 | PF05014 | PF05719 | PF06546 | PF07575 | PF08147 |         |
| PF00357 | PF00773 | PF01160 | PF01544 | PF02098 | PF02728 | PF03188 | PF03839 | PF04425 | PF05019 | PF05721 | PF06553 | PF07576 | PF08148 |         |
| PF00362 | PF00774 | PF01161 | PF01545 | PF02100 | PF02729 | PF03190 | PF03847 | PF04426 | PF05020 | PF05722 | PF06554 | PF07593 | PF08149 |         |
| PF00364 | PF00777 | PF01162 | PF01551 | PF02101 | PF02731 | PF03194 | PF03849 | PF04427 | PF05021 | PF05724 | PF06566 | PF07647 | PF08150 |         |
| PF00365 | PF00778 | PF01163 | PF01554 | PF02102 | PF02732 | PF03198 | PF03850 | PF04428 | PF05022 | PF05726 | PF06567 | PF07649 | PF08151 |         |
| PF00366 | PF00779 | PF01166 | PF01557 | PF02104 | PF02733 | PF03199 | PF03851 | PF04433 | PF05023 | PF05729 | PF06573 | PF07650 | PF08152 |         |
| PF00368 | PF00780 | PF01167 | PF01562 | PF02106 | PF02734 | PF03200 | PF03853 | PF04434 | PF05024 | PF05730 | PF06581 | PF07651 | PF08153 |         |
| PF00372 | PF00784 | PF01168 | PF01564 | PF02109 | PF02735 | PF03208 | PF03855 | PF04437 | PF05026 | PF05731 | PF06583 | PF07657 | PF08154 |         |
| PF00375 | PF00786 | PF01169 | PF01565 | PF02110 | PF02737 | PF03215 | PF03856 | PF04438 | PF05028 | PF05735 | PF06584 | PF07662 | PF08155 |         |

|         |         |         |         |         |         |         |         |         |         |         |         |         |         |  |
|---------|---------|---------|---------|---------|---------|---------|---------|---------|---------|---------|---------|---------|---------|--|
| PF00377 | PF00787 | PF01170 | PF01569 | PF02112 | PF02738 | PF03224 | PF03858 | PF04440 | PF05030 | PF05741 | PF06588 | PF07670 | PF08156 |  |
| PF00378 | PF00790 | PF01171 | PF01575 | PF02114 | PF02740 | PF03226 | PF03867 | PF04442 | PF05032 | PF05742 | PF06602 | PF07677 | PF08157 |  |
| PF00382 | PF00791 | PF01172 | PF01581 | PF02115 | PF02743 | PF03227 | PF03868 | PF04446 | PF05033 | PF05743 | PF06608 | PF07678 | PF08158 |  |
| PF00383 | PF00792 | PF01174 | PF01583 | PF02116 | PF02744 | PF03232 | PF03870 | PF04468 | PF05038 | PF05746 | PF06614 | PF07683 | PF08159 |  |
| PF00384 | PF00793 | PF01175 | PF01586 | PF02121 | PF02747 | PF03234 | PF03871 | PF04478 | PF05039 | PF05753 | PF06621 | PF07684 | PF08160 |  |
| PF00386 | PF00795 | PF01176 | PF01588 | PF02126 | PF02749 | PF03239 | PF03874 | PF04479 | PF05040 | PF05756 | PF06623 | PF07687 | PF08161 |  |
| PF00388 | PF00797 | PF01177 | PF01591 | PF02127 | PF02750 | PF03247 | PF03875 | PF04487 | PF05041 | PF05760 | PF06625 | PF07691 | PF08162 |  |
| PF00390 | PF00800 | PF01179 | PF01592 | PF02130 | PF02751 | PF03248 | PF03876 | PF04488 | PF05046 | PF05761 | PF06628 | PF07699 | PF08163 |  |
| PF00393 | PF00801 | PF01180 | PF01595 | PF02133 | PF02755 | PF03250 | PF03878 | PF04493 | PF05047 | PF05764 | PF06631 | PF07701 | PF08164 |  |
| PF00394 | PF00804 | PF01183 | PF01596 | PF02134 | PF02757 | PF03253 | PF03879 | PF04494 | PF05051 | PF05769 | PF06632 | PF07703 | PF08165 |  |
| PF00396 | PF00806 | PF01184 | PF01597 | PF02135 | PF02758 | PF03256 | PF03893 | PF04495 | PF05053 | PF05777 | PF06637 | PF07706 | PF08168 |  |
| PF00397 | PF00808 | PF01185 | PF01598 | PF02137 | PF02759 | PF03259 | PF03894 | PF04499 | PF05057 | PF05778 | PF06638 | PF07710 | PF08169 |  |
